# Supplementary material for: Synthesis of nucleoside-substituted carbonate and diol derivatives through the carbon dioxide reaction using polyionic liquid catalysts
Source: Royal Society of Chemistry journal article supplement (doi:10.1039/d2gc00566b), 2022-01-01
Supplement: d2gc00566b1.pdf [file d2gc00566b1.pdf]

## Supporting information:

# Synthesis of Nucleosides-substituted Carbonate and Diol Derivatives through the Carbon Dioxide Reaction Using Polyionic Liquid Catalyst

Gui-Qing Xu<sup>a</sup>, Xue-Ning Ma<sup>a</sup>, Xian-Bin Jia<sup>a</sup>, Ya-Hao Dong<sup>a</sup>, Xin-Juan Li<sup>a,\*</sup>

## 1. Experiment

### 1.1. Materials

L1-L4 (99 %), ethylene oxide (99 %), chiral ethylene oxide (99 %) were purchased from Aladdin Chemical Co. Nucleoside 9-epoxy purine was synthesized according to the literature.<sup>1</sup> CO<sub>2</sub> (99.99 %) and N<sub>2</sub> (99.99%) were purchased from Xinxiang special gas company.

### 1.2 Methods.

<sup>1</sup>H NMR spectra were measured on a Bruker 400 MHz NMR spectrometer. A Thermo FLASH 1112 elemental analyzer was used to determine the elemental analysis. The IR measurements were carried out on a Fourier transform infrared spectrometer (Nicolet 94 NEXUS). HPLC method was performed on an Agilent TM 1100. The molecular weight and molecular weight distribution (PDI = Mw/Mn) of the synthesized polymer samples were determined by gel permeation chromatography (GPC) equipped with a Waters 1515 apparatus, DMF was used as eluent, the flow rate was 1.0 mL.min, and polystyrene samples were used as standards. DSC was performed on a custom-made PCT-1A thermal analysis system. The microstructure morphology of the samples were observed by using an Olympus BX51 polarizing optical microscope (POM) equipped with a Linksys 32 THMSE600 hot stage and a digital camera (Micropublisher

5.0 RTV).

### 1.3 Synthesis of polyionic liquids

Synthesis of P1: Polyepichlorohydrin (PECH) and aminopropyl imidazole were used as raw materials, and PECH with molecular weight of 500 (10 g, 20 mmol) was added into Shrek bottle. After degassing for 30 min, aminopropyl imidazole (6 g, 48 mmol) was added in a syringe drop by drop. After full stirring, the Shrek bottle was sealed and immersed in an oil bath at 80 °C for reaction 10 h. After the reaction, sedimentation in ether, then dissolved with ethanol, and then sedimentation in ether, repeat the above operation, until no small molecule was detected, and vacuum drying at 60 °C for 48 h. 3 g P1 was weighed and dissolved in 30 mL water, and lithium bromide 6 g was dissolved in 10 mL water, then dropped into PIL aqueous solution at room temperature, and then put it into an oil bath at 40 °C for 24 h. It is then put into a dialysis bag with a molecular weight of 500 to dialysis until no chloride ions leak out of the aqueous phase. Freeze-dried products can be obtained. The synthesis of other ionic liquids was similar. The synthesis route is shown in the Scheme. S1.

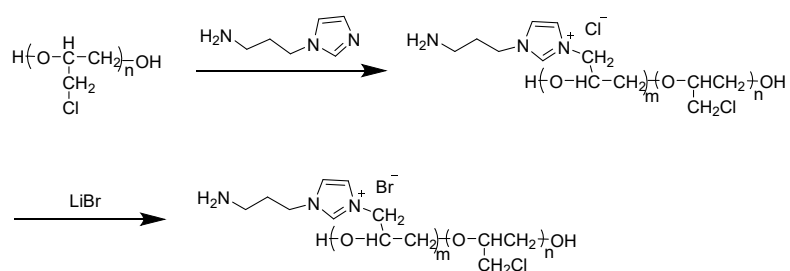

Scheme S1 Synthesis pathway of polyionic liquids (P1-P5)

### 1.4 Catalytic reaction

The reaction substrate and catalyst were added into the reactor,  $\text{CO}_2$  was introduced, and the reaction was carried out under certain pressure conditions. After the reaction, dichloromethane was added to extract the product, and the product was purified by

column chromatography. Cyclic reaction of catalysts: after the product was extracted by dichloromethane, the polyionic liquid was completely retained, the reaction substrate was added again, mixed, and CO<sub>2</sub> was introduced to continue the reaction.

## 2. Characterization of polyionic liquids

Table S1 T<sub>g</sub> of PILs from DSC results and Cl<sup>-</sup> content of PILs from ion chromatography

| PIL                   | P1  | P2  | P3   | P4   | P5  | P6   | P7   | P8   |
|-----------------------|-----|-----|------|------|-----|------|------|------|
| T <sub>g</sub> (°C)   | 8.4 | 44  | 32   | 19   | 5.2 | 15.6 | 21.4 | -0.9 |
| Graft ratio (%)       | 45  | 63  | 29   | 42   | 42  | 45   | 13   | 13   |
| Weight molecular (Mn) | 500 | 500 | 1000 | 1000 | 250 | 1000 | 1000 | 1000 |

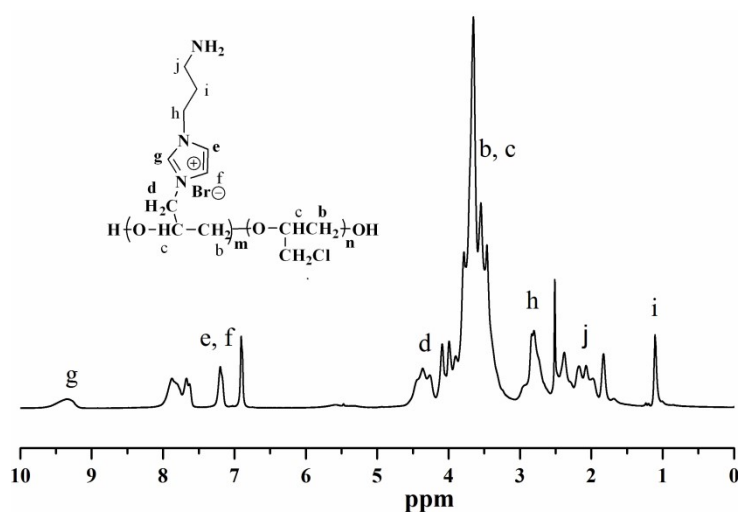

Fig. S1 <sup>1</sup>H NMR spectra of P1

### 2.1 Calculation of grafting rate

Grafting rates were calculated by <sup>1</sup>H NMR of polymer. Take P1 as an example, imidazole connected H (δ 4.29) was taken as the standard in NMR, and the corresponding integral of other peaks in imidazole was marked. δ 3.63 was the hydrogen of PECH which not connected to 1H-Imidazole-1-propanamine and PECH without chemical shift. The ratio of the integral H (δ 4.29) and H (δ 3.63) was the graft rate, that is, the graft rate of P1 is 5/11=45%.

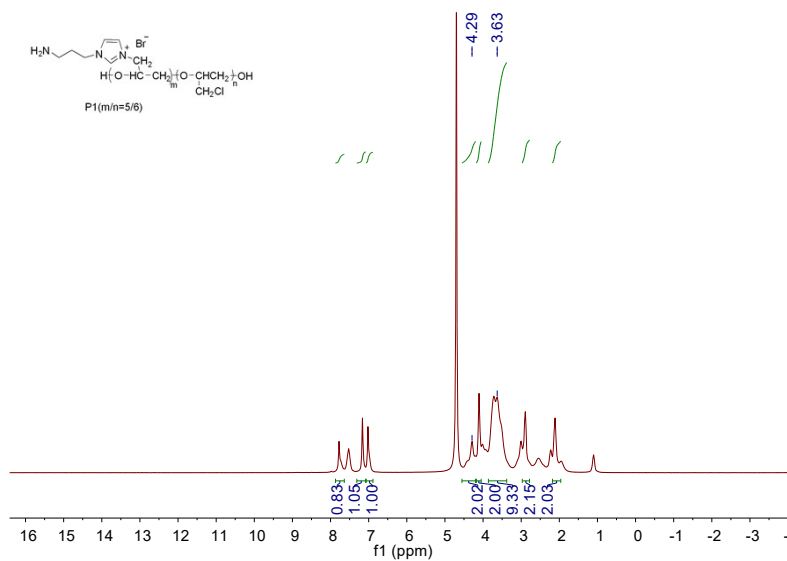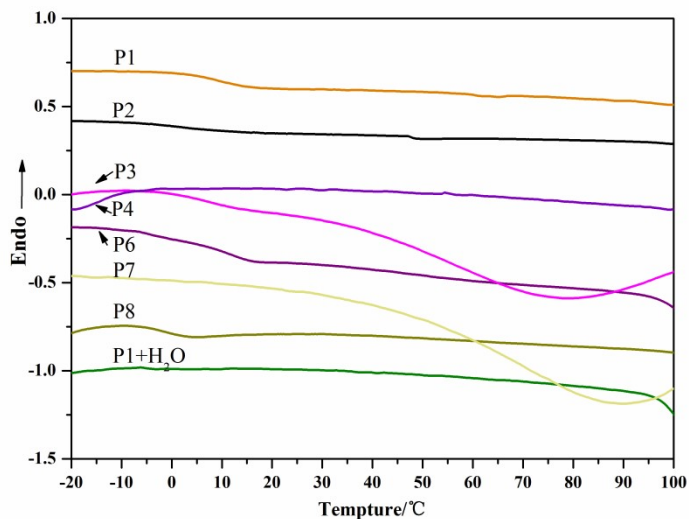

Fig. S2 DSC of polymers.

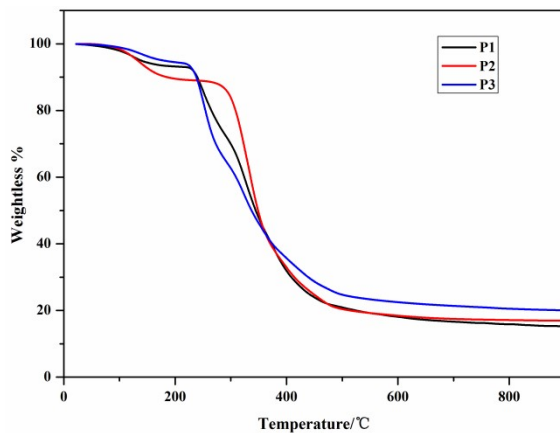

Fig.S3 Tg of polymers.

### 3. Catalytic properties

Table S2 P1 catalyzes the cycloaddition of ethylene oxide and previously reported ionic liquid and polyionic liquid catalysis

| Catalysts                                             | Catalyst loading (%) | t/h | T/°C | Pressure | water | Yield (%) <sup>a</sup> | Reference |
|-------------------------------------------------------|----------------------|-----|------|----------|-------|------------------------|-----------|
| P1                                                    | 2                    | 11  | 30   | 2 MPa    | /     | 9                      | This work |
| P1                                                    | 2                    | 11  | 30   | 2 MPa    | 15 eq | 16                     | This work |
| P1                                                    | 2                    | 5   | 60   | 2 MPa    | /     | 72                     | This work |
| P1                                                    | 2                    | 5   | 60   | 2 MPa    | /     | 72                     | This work |
| P1                                                    | 2                    | 11  | 60   | 2 MPa    | /     | 91                     | This work |
| [C <sub>1</sub> C <sub>4</sub> Im][HCO <sub>3</sub> ] | 6.25                 | 30  | 60   | 2 MPa    | /     | 94                     | 2         |
| P(DMAE-MA-EtOH)Br                                     | 1                    | 3   | 110  | 2 MPa    | /     | 99                     | 3         |
| VCEImBr-TMPTA-HMEA                                    | 1.5                  | 1.5 | 120  | 2 MPa    | /     | 99                     | 4         |
| P(DEMA-EtOH)@SiO <sub>2</sub>                         | 0.5                  | 3   | 120  | 2.5 MPa  | /     | 91                     | 5         |
| P[EEBVI-M]Cl <sub>2</sub> -EGDMA                      | 0.9                  | 12  | 100  | 1 MPa    | /     | 99                     | 6         |
| [bmim][M-ET]                                          | 0.5                  | 4   | 120  | 2 MPa    | /     | 89                     | 7         |
| [DBUH] <sub>2</sub> [Cys]                             | 25                   | 24  | 30   | 0.1 MPa  | /     | 96                     | 8         |
| NMI-OH-                                               | 1                    | 4   | 120  | 1 MPa    | /     | 80                     | 9         |

|                 |   |   |     |       |   |    |    |
|-----------------|---|---|-----|-------|---|----|----|
| NH <sub>2</sub> |   |   |     |       |   |    |    |
| PVIM-Br         | 5 | 3 | 120 | 2 MPa | / | 94 | 10 |

<sup>a</sup> the yield was determined by <sup>1</sup>H NMR.

Table S3 Effects of solvent on the yield of cycloaddition of CO<sub>2</sub>

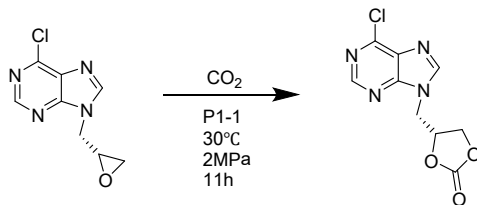

| Solvent            | PIL: Solvent | Con/% | Yield/% | Mol ratio<br>of PIL:<br>solvent | Con/% | Yield/% |
|--------------------|--------------|-------|---------|---------------------------------|-------|---------|
| H <sub>2</sub> O   | 1:1          | 100   | 94      | 1:10                            | 100   | 57      |
| CH <sub>3</sub> CN | 1:1          | 55    | 34      | 1:10                            | 70    | 41      |
| MeOH               | 1:1          | 35    | 21      | 1:10                            | 91    | 35      |
| DCM                | 1:1          | 49    | 32      | 1:10                            | 87    | 36      |

Table S4 Effects of water on the yield of the product

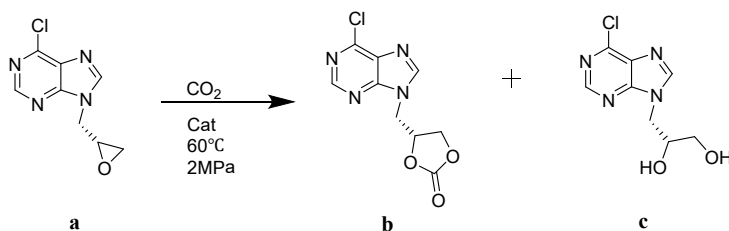

| Entry | Cat.            | $\overline{Mn}$ | Grafting<br>ratio (%) | T/H <sub>2</sub> O | Yield<br>(b)<br>(%) | T/H <sub>2</sub> O | Yield<br>(c) (%) |
|-------|-----------------|-----------------|-----------------------|--------------------|---------------------|--------------------|------------------|
| 1     | P1              | 500             | 45                    | 30 °C/15 eq        | 94                  | 60 °C/35 eq        | 75               |
| 2     | P1 <sup>d</sup> | 500             | 45                    | 30 °C/15 eq        | 0                   | 60 °C/35 eq        | 0                |
| 3     | P2              | 500             | 63                    | 30 °C/15 eq        | 63                  | 60 °C/35 eq        | 47               |
| 4     | P3              | 1000            | 29                    | 30 °C/15 eq        | 45                  | 60 °C/35 eq        | 38               |
| 5     | P4              | 1000            | 42                    | 30 °C/15 eq        | 51                  | 60 °C/35 eq        | 59               |
| 6     | P5              | 250             | 42                    | 30 °C/15 eq        | 86                  | 60 °C/35 eq        | 43               |
| 7     | P6              | 500             | 45                    | 30 °C/15 eq        | 41                  | 60 °C/35 eq        | 5                |
| 8     | P7              | 1000            | 13                    | 30 °C/15 eq        | 84                  | 60 °C/35 eq        | 2                |
| 9     | P8              | 1000            | 13                    | 30 °C/15 eq        | 0                   | 60 °C/35 eq        | 0                |

|    |    |             |    |             |    |
|----|----|-------------|----|-------------|----|
| 10 | L1 | 30 °C/15 eq | 45 | 60 °C/35 eq | 9  |
| 11 | L2 | 30 °C/15 eq | 0  | 60 °C/35 eq | 0  |
| 12 | L2 | 30 °C/15 eq | 52 | 60 °C/35 eq | 42 |
|    |    | (2h)        |    | (6h)        |    |
| 13 | L3 | 30 °C/15 eq | 95 | 60 °C/35 eq | 0  |
| 14 | L4 | 30 °C/15 eq | 92 | 60 °C/35 eq | 0  |

d: The reaction was carried out without CO<sub>2</sub>.

Table S5 Ester hydrolysis catalyzed by different catalysts under 60 °C and 200 ul water

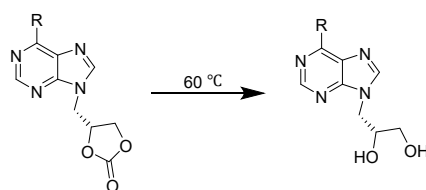

| Cat                            | t/h | Conversion (%) <sup>a</sup> | Yield (%) <sup>b</sup> |
|--------------------------------|-----|-----------------------------|------------------------|
| K <sub>2</sub> CO <sub>3</sub> | 3   | 100                         | 82                     |
| P1                             | 22  | 100                         | 86                     |
| P6                             | 22  | 100                         | 76                     |
| L1                             | 22  | 100                         | 45                     |
| L2                             | 20  | 100                         | 60                     |

<sup>a</sup> was determined by <sup>1</sup>H NMR, <sup>b</sup> was the isolated yield.

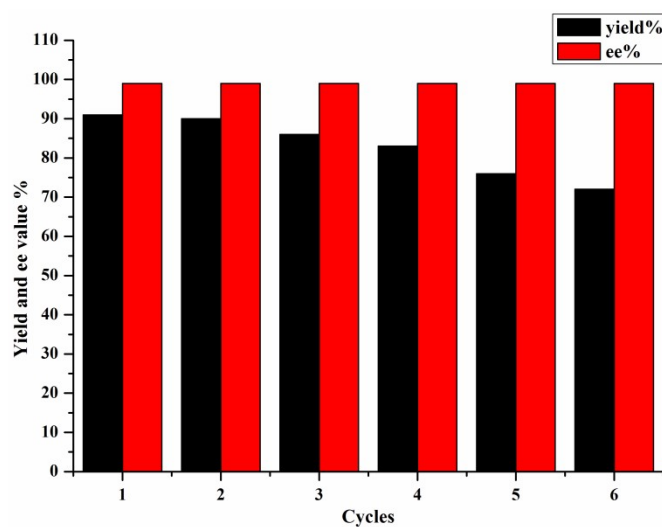

Fig. S4 Cyclic catalytic performance of P1 under the condition:P1/water/epoxy=1/35/1 at 60 °C.

#### 4. Mechanisms

Table S6 pH of different of ionic liquids with the mole ratio of ionic liquid:H<sub>2</sub>O=1:1 at 25 °C

| P1  | P2  | P3  | P4  | P5  | P6  | P7  | P8  | L1  | L2  | L3  | L4  |
|-----|-----|-----|-----|-----|-----|-----|-----|-----|-----|-----|-----|
| 8.0 | 7.2 | 6.4 | 6.4 | 7.2 | 8.0 | 6.4 | 6.4 | 7.5 | 9.0 | 6.2 | 6.1 |

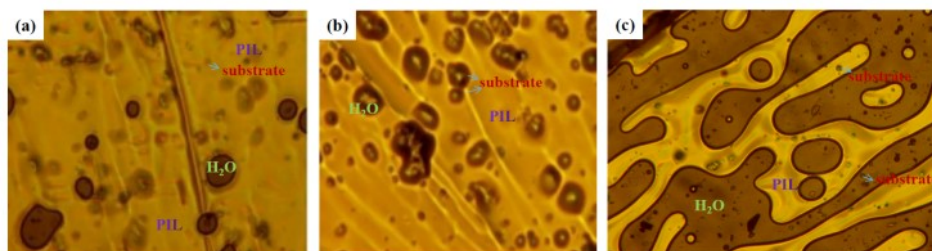

Fig. S5 Image of the phase state for P1, H<sub>2</sub>O and solid substrate from POM, P1/water/epoxy=1/15/1 at 25 °C (a), P1/water/epoxy=1/35/1 at 60 °C (b), and P1/water/epoxy=1/70/1 at 60 °C (c).

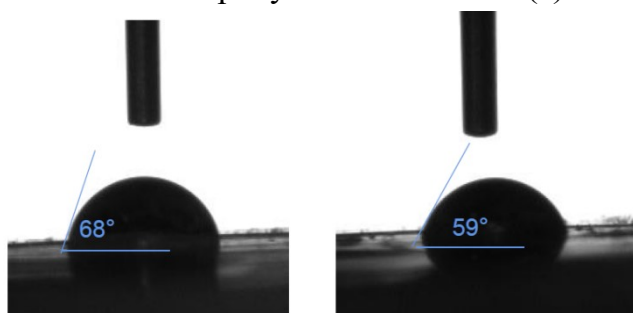

Fig. S6 The contact angle experiment of P1 (left), and P1 after introducing CO<sub>2</sub> (right).

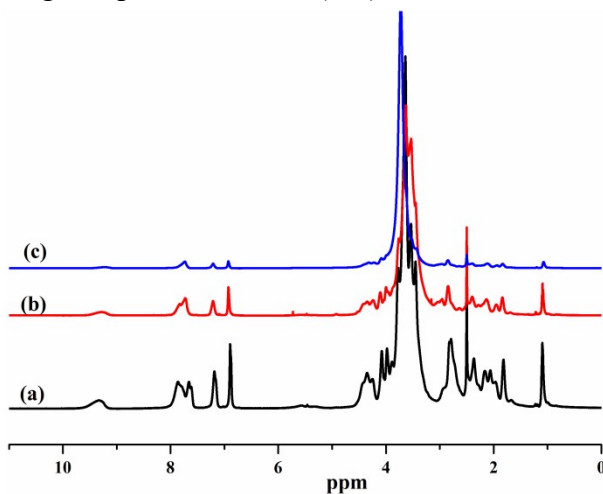

Fig. S7 <sup>1</sup>H NMR spectra of P1 (a), P1 after introducing CO<sub>2</sub> (b), and P1 after introducing CO<sub>2</sub> and H<sub>2</sub>O, P1/H<sub>2</sub>O=1/15 (c).



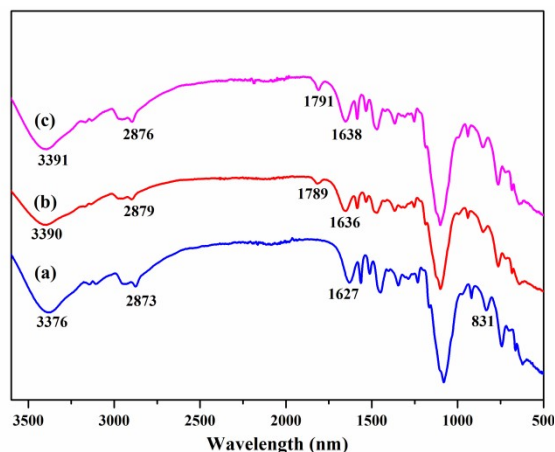

Fig. S8 FTIR of P1 (a), P1 after introducing CO<sub>2</sub> (b), and P1 after introducing CO<sub>2</sub> and H<sub>2</sub>O, P1/H<sub>2</sub>O=1/15 (c).

## 5. Characterization of products and raw materials

<sup>1</sup>H and <sup>13</sup>C NMR data

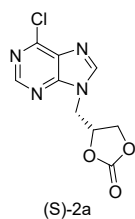

<sup>1</sup>H NMR (400 MHz, CDCl<sub>3</sub>) δ 8.77 (s, 1H), 8.24 (s, 1H), 5.18 (m, 1H), 4.69 (dt, *J* = 11.1, 5.8 Hz, 2H), 4.59 (dd, *J* = 15.1, 6.4 Hz, 1H), 4.36 (dd, *J* = 9.2, 6.5 Hz, 1H).

<sup>13</sup>C NMR (100 MHz, DMSO) δ 154.1, 152.1, 151.8, 149.2, 147.6, 130.7, 74.4, 67.0, 45.5.

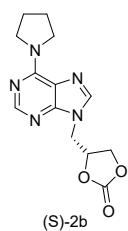

<sup>1</sup>H NMR (400 MHz, CDCl<sub>3</sub>) δ 8.38 (s, 1H), 7.85 (s, 1H), 5.26 – 5.07 (m, 1H), 4.68 – 4.51 (m, 3H), 4.41 (dd, *J* = 9.0, 6.6 Hz, 1H), 4.23 (s, 2H), 3.82 (s, 2H), 2.09 (d, *J* = 20.3 Hz, 4H).

<sup>13</sup>C NMR (100 MHz, CDCl<sub>3</sub>) δ 153.8, 153.1, 150.1, 138.8, 119.9, 74.4, 66.5, 44.7.

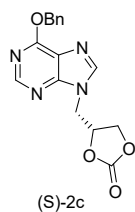

<sup>1</sup>H NMR (400 MHz, CDCl<sub>3</sub>) δ 8.56 (s, 1H), 8.22 (s, 1H), 7.54 (d, *J* = 7.1 Hz, 2H), 7.44 – 7.30 (m, 3H), 5.18 (s, 1H), 4.65 (dd, *J* = 22.3, 12.3 Hz, 3H), 4.46 – 4.30 (m, 1H).

$^{13}\text{C}$  NMR (100 MHz,  $\text{CDCl}_3$ )  $\delta$  153.3, 142.3, 135.7, 128.5, 128.4, 128.3, 74.0, 68.8, 66.5.

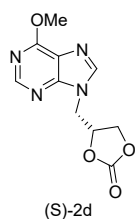

$^1\text{H}$  NMR (400 MHz,  $\text{CDCl}_3$ )  $\delta$  8.54 (s, 1H), 8.05 (s, 1H), 5.23 – 5.07 (m, 1H), 4.75 – 4.51 (m, 3H), 4.37 (dd,  $J = 9.0, 6.6$  Hz, 1H), 4.21 (s, 3H).

$^{13}\text{C}$  NMR (100 MHz,  $\text{CDCl}_3$ )  $\delta$  161.3, 153.5, 152.7, 152.1, 142.4, 121.4, 74.3, 66.66, 54.6, 45.4.

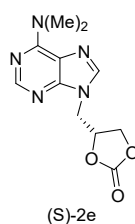

$^1\text{H}$  NMR (400 MHz,  $\text{CDCl}_3$ )  $\delta$  8.38 (s, 1H), 7.84 (s, 1H), 5.08 – 5.24 (m, 1H), 4.67 (dd,  $J = 20.9, 12.0$  Hz, 2H), 4.55 (dd,  $J = 15.4, 6.2$  Hz, 1H), 4.36 (dd,  $J = 9.2, 6.5$  Hz, 1H), 3.78 – 3.30 (m, 6H).

$^{13}\text{C}$  NMR (150 MHz,  $\text{CDCl}_3$ )  $\delta$  154.0, 152.8, 151.7, 149.4, 137.4, 118.8, 73.4, 65.5, 64.7, 60.7, 43.8.

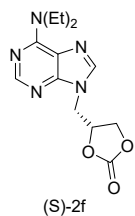

$^1\text{H}$  NMR (400 MHz,  $\text{CDCl}_3$ )  $\delta$  8.31 (s, 1H), 7.81 (s, 1H), 5.18 – 5.09 (m, 1H), 4.60 (dd,  $J = 11.0, 6.5$  Hz, 1H), 4.48–4.56 (m, 2H), 4.37 (dd,  $J = 9.1, 6.6$  Hz, 1H), 4.29 – 3.76 (m, 4H), 1.31 (t,  $J = 7.0$  Hz, 7H).

$^{13}\text{C}$  NMR (100 MHz,  $\text{CDCl}_3$ )  $\delta$  153.9, 153.8, 152.9, 150.5, 138.4, 119.3, 74.4, 66.5, 44.7.

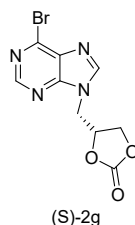

$^1\text{H}$  NMR (400 MHz,  $\text{CDCl}_3$ )  $\delta$  8.72 (s, 1H), 8.26 (s, 1H), 5.18 (m, 1H), 4.74 – 4.64 (m, 2H), 4.58 (dd,  $J = 15.1, 6.3$  Hz, 1H), 4.36 (dd,  $J = 9.2, 6.4$  Hz, 1H).

$^{13}\text{C}$  NMR (100 MHz,  $\text{CDCl}_3$ )  $\delta$  158.3, 153.3, 152.3, 149.8, 145.2, 73.9, 66.4, 45.8.

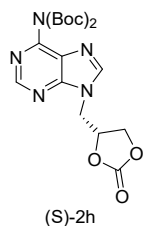

$^1\text{H}$  NMR (400 MHz,  $\text{CDCl}_3$ )  $\delta$  8.86 (s, 1H), 8.24 (s, 1H), 5.18 (s, 1H), 4.89 – 4.51 (m, 3H), 4.39 (s, 1H), 1.47 (s, 18H).

$^{13}\text{C}$  NMR (100 MHz,  $\text{CDCl}_3$ )  $\delta$  163.1, 155.1, 149.3, 148.3, 97.0, 85.3, 74.3, 66.9, 52.3, 27.7.

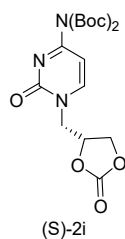

$^1\text{H}$  NMR (400 MHz,  $\text{CDCl}_3$ )  $\delta$  7.69 – 7.54 (m, 1H), 7.19 – 7.07 (m, 1H), 5.17 – 5.00 (m, 1H), 4.63 (t,  $J$  = 8.8 Hz, 1H), 4.46 – 4.21 (m, 2H), 3.97 (dd,  $J$  = 14.3, 7.1 Hz, 1H), 1.56 (s, 18H).

$^{13}\text{C}$  NMR (100 MHz,  $\text{CDCl}_3$ )  $\delta$  163.1, 155.1, 149.3, 148.3, 97.0, 85.3, 74.3, 66.9, 52.3, 27.7.

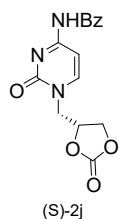

$^1\text{H}$  NMR (600 MHz, DMSO)  $\delta$  11.24 (s, 1H), 8.13 (d,  $J$  = 7.3 Hz, 1H), 8.01 (d,  $J$  = 7.3 Hz, 2H), 7.63 (t,  $J$  = 7.4 Hz, 1H), 7.52 (t,  $J$  = 7.8 Hz, 2H), 7.33 (d,  $J$  = 6.3 Hz, 1H), 5.19 – 5.09 (m, 1H), 4.64 (t,  $J$  = 8.5 Hz, 1H), 4.36 (dd,  $J$  = 8.6, 6.3 Hz, 1H), 4.27 (dd,  $J$  = 14.1, 3.6 Hz, 1H), 4.21 (dd,  $J$  = 14.2, 7.8 Hz, 1H).

$^{13}\text{C}$  NMR (150 MHz, DMSO)  $\delta$  164.0, 154.8, 151.2, 133.2, 128.9, 127.9, 96.7, 74.6, 67.6, 66.3, 61.1, 55.4, 51.8.

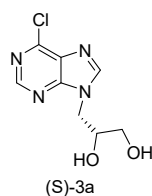

$^1\text{H}$  NMR (400 MHz, DMSO)  $\delta$  8.77 (s, 1H), 8.60 (s, 1H), 5.15 (d,  $J$  = 4.1 Hz, 1H), 4.88 (t,  $J$  = 4.8 Hz, 1H), 4.46 (dd,  $J$  = 13.9, 3.4 Hz, 1H), 4.17 (dd,  $J$  = 14.0, 8.7 Hz, 1H), 3.90 (s, 1H), 3.45 (d,  $J$  = 5.0 Hz, 2H).

$^{13}\text{C}$  NMR (100 MHz, DMSO)  $\delta$  152.7, 151.8, 149.3, 148.7, 131.2, 69.8, 64.0, 47.9.

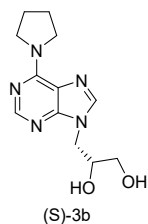

$^1\text{H}$  NMR (400 MHz, DMSO)  $\delta$  8.19 (s, 1H), 8.02 (s, 1H), 5.11 (s, 1H), 4.86 (d,  $J = 5.0$  Hz, 1H), 4.31 (dd,  $J = 13.9, 3.7$  Hz, 1H), 4.02 (dd,  $J = 13.9, 8.0$  Hz, 3H), 3.83 (s, 1H), 3.64 (s, 2H), 3.36 – 3.24 (m, 2H), 1.95 (s, 4H).

$^{13}\text{C}$  NMR (100 MHz, DMSO)  $\delta$  153.0, 152.4, 150.5, 141.5, 119.7, 70.1, 63.9, 46.8.

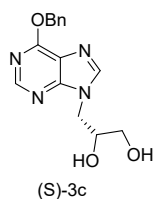

$^1\text{H}$  NMR (400 MHz,  $\text{CDCl}_3$ )  $\delta$  8.52 (s, 1H), 8.03 (s, 1H), 7.55 (d,  $J = 7.1$  Hz, 2H), 7.46 – 7.30 (m, 3H), 5.60 (s, 2H), 4.36 (m, 2H), 4.11 (s, 1H), 3.51 (d,  $J = 3.9$  Hz, 2H).

$^{13}\text{C}$  NMR (100 MHz,  $\text{CDCl}_3$ )  $\delta$  159.8, 151.7, 151.6, 143.6, 135.7, 128.9, 128.6, 128.5, 120.5, 69.5, 68.9, 63.4, 47.4.

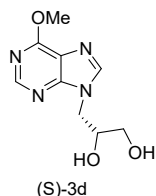

$^1\text{H}$  NMR (400 MHz,  $\text{CDCl}_3$ )  $\delta$  8.53 (s, 1H), 8.01 (s, 1H), 4.41 (dd,  $J = 4.9, 2.1$  Hz, 2H), 4.20 (s, 3H), 4.14 (t,  $J = 4.0$ , 1H), 3.57 ( $J = 4.0$ , 2H).

$^{13}\text{C}$  NMR (100 MHz, DMSO)  $\delta$  151.7, 145.1, 137.0, 124.0, 122.7, 36.3, 31.9, 19.2, 13.7.

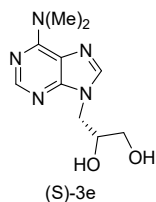

$^1\text{H}$  NMR (400 MHz, DMSO)  $\delta$  8.20 (s, 1H), 8.04 (s, 1H), 5.09 (d,  $J = 5.5$  Hz, 1H), 4.83 (t,  $J = 5.7$  Hz, 1H), 4.50 – 4.34 (m, 1H), 4.30 (dd,  $J = 13.9, 3.6$  Hz, 1H), 4.00 (dd,  $J = 13.9, 8.1$  Hz, 1H), 3.88 – 3.73 (m, 1H), 3.55 – 3.41 (m, 4H), 3.30 (d,  $J = 5.8$  Hz, 2H).

$^{13}\text{C}$  NMR (100 MHz, DMSO)  $\delta$  154.7, 152.0, 150.9, 141.0, 119.5, 73.0, 70.1, 64.0, 63.6, 46.9.

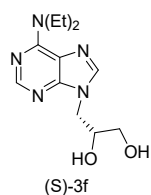

$^1\text{H}$  NMR (400 MHz, DMSO)  $\delta$  8.19 (s, 1H), 8.04 (s, 1H), 5.12 – 5.06 (m, 1H), 4.85 (t,  $J$  = 4.9 Hz, 1H), 4.30 (dd,  $J$  = 13.9, 3.4 Hz, 1H), 4.00 (dd,  $J$  = 13.9, 8.1 Hz, 4H), 3.83 (d,  $J$  = 3.6 Hz, 2H), 1.19 (t,  $J$  = 6.9 Hz, 7H).

$^{13}\text{C}$  NMR (100 MHz, DMSO)  $\delta$  153.5, 152.2, 150.9, 141.2, 119.0, 70.1, 64.0, 46.9, 14.0.

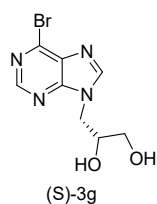

$^1\text{H}$  NMR (400 MHz, DMSO)  $\delta$  8.19 (s, 1H), 8.04 (s, 1H), 5.11 (d,  $J$  = 4.4 Hz, 1H), 4.87 (s, 1H), 4.30 (dd,  $J$  = 13.9, 3.5 Hz, 1H), 4.00 (dd,  $J$  = 13.9, 8.1 Hz, 2H), 3.83 (s, 2H).

$^{13}\text{C}$  NMR (100 MHz, DMSO)  $\delta$  153.5, 152.2, 150.9, 141.2, 119.0, 70.1, 64.0, 46.9.

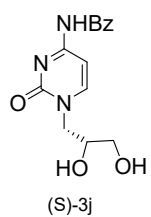

$^1\text{H}$  NMR (400 MHz, DMSO)  $\delta$  11.13 (s, 1H), 8.11 – 7.94 (m, 3H), 7.63 (t,  $J$  = 7.4 Hz, 1H), 7.52 (t,  $J$  = 7.6 Hz, 2H), 7.28 (d,  $J$  = 5.3 Hz, 1H), 5.06 (d,  $J$  = 5.6 Hz, 1H), 4.77 (t,  $J$  = 5.7 Hz, 1H), 4.16 (dd,  $J$  = 13.1, 3.2 Hz, 1H), 3.84 – 3.73 (m, 1H), 3.52 (dd,  $J$  = 13.1, 8.7 Hz, 1H), 3.46 – 3.40 (m, 1H), 3.32 (dd,  $J$  = 10.2, 4.6 Hz, 1H).

$^{13}\text{C}$  NMR (150 MHz, DMSO)  $\delta$  167.7, 163.4, 156.0, 152.0, 133.7, 133.1, 128.8, 128.8, 95.8, 69.1, 64.22, 53.6.

$^1\text{H}$  data

01242021-mxn-6-C1

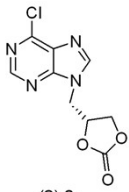

<sup>1</sup>H NMR (400 MHz, CDCl<sub>3</sub>)

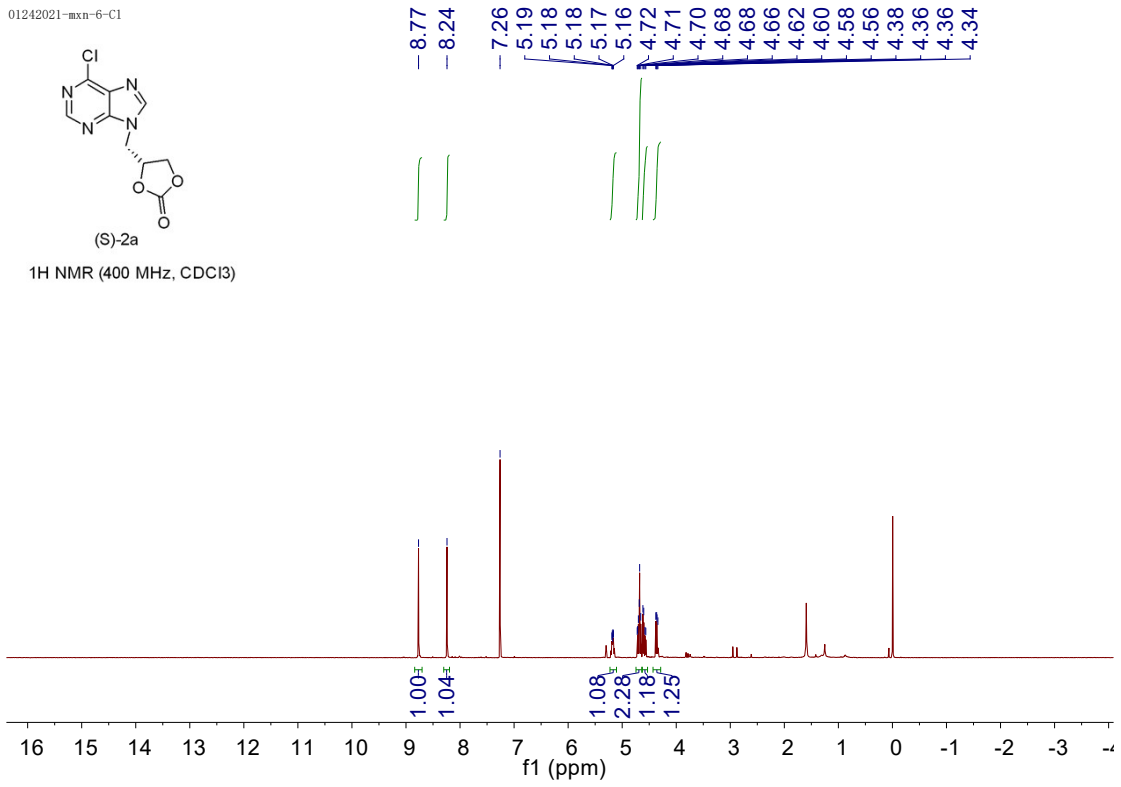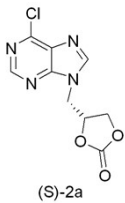

<sup>1</sup>H NMR (100 MHz, DMSO)

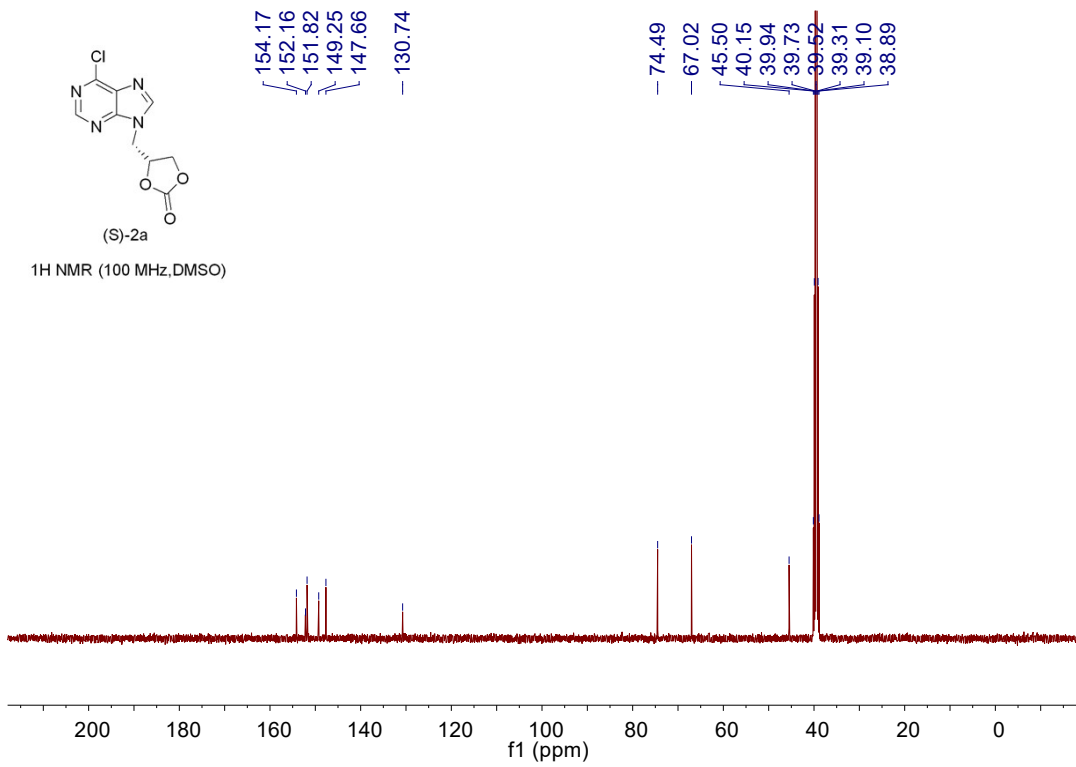

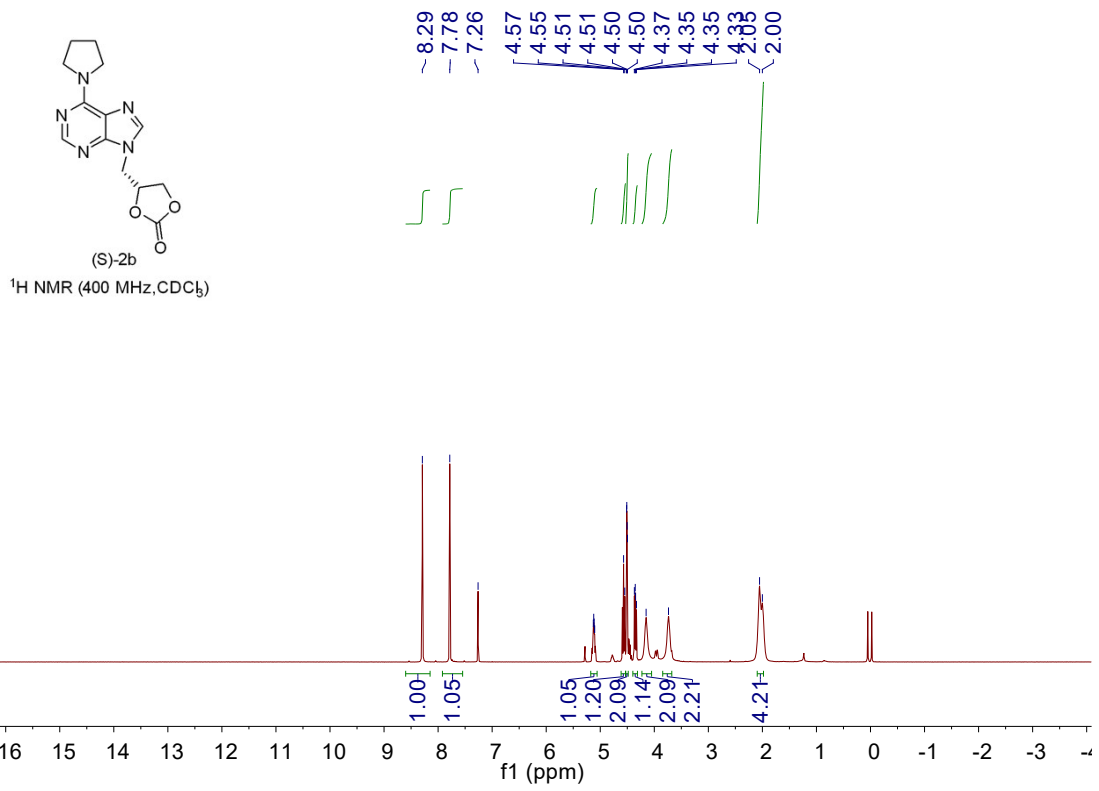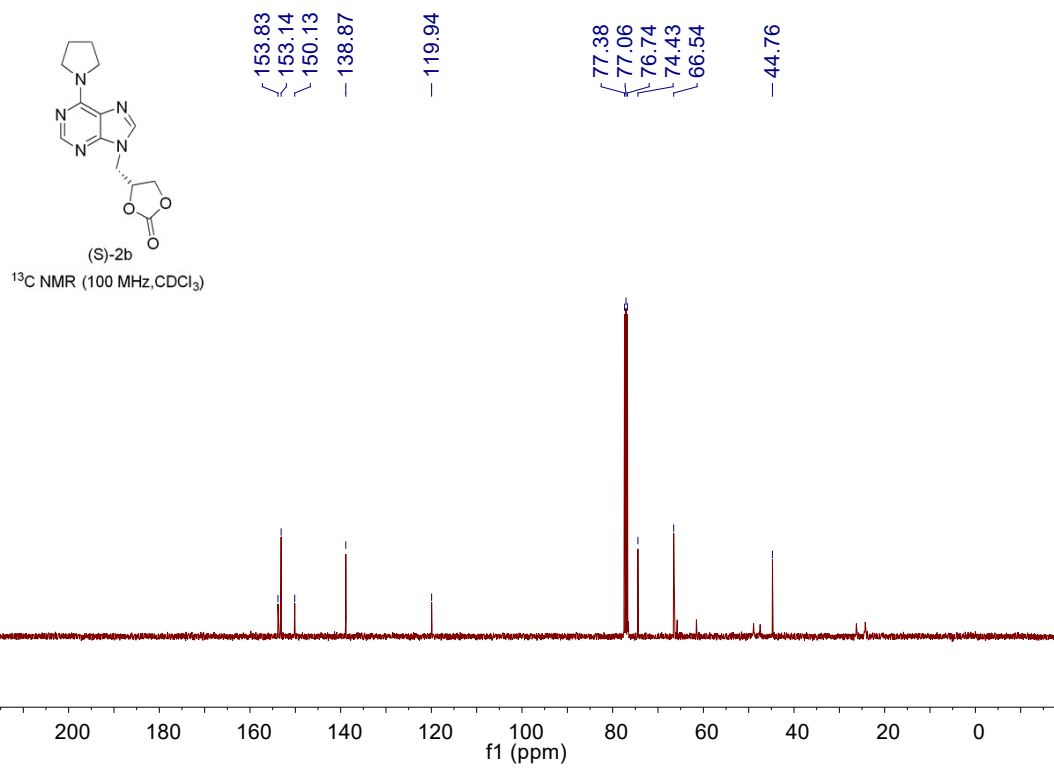

01202021-mxn-OBn

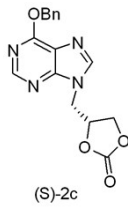

<sup>1</sup>H NMR (400 MHz, CDCl<sub>3</sub>)

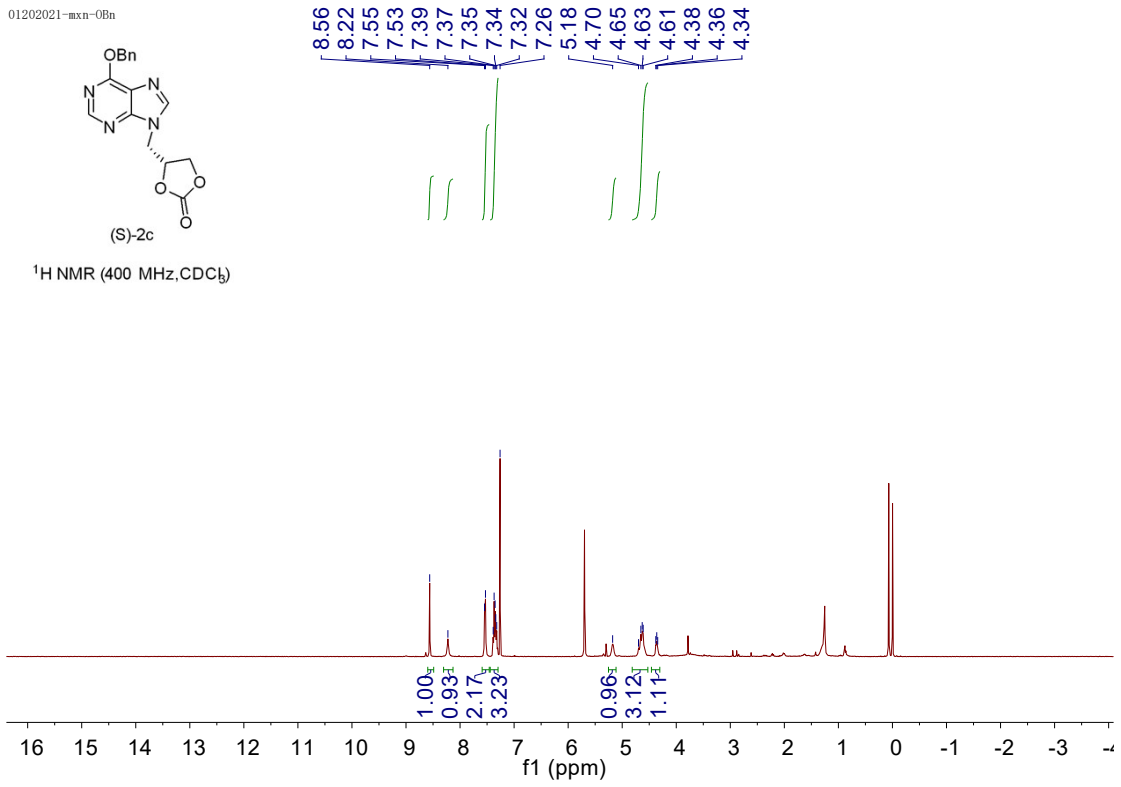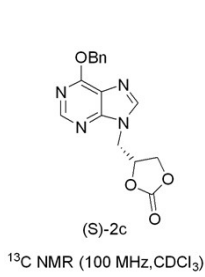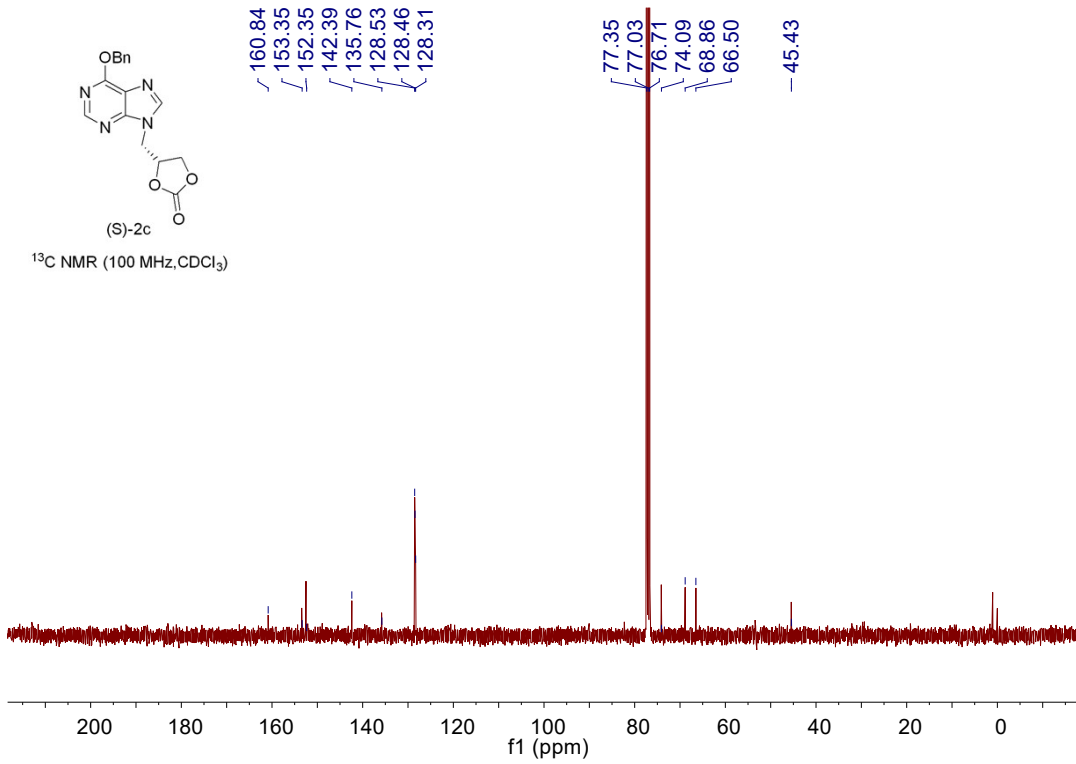



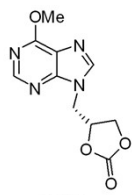

(S)-2d

<sup>1</sup>H NMR (400 MHz, CDCl<sub>3</sub>)

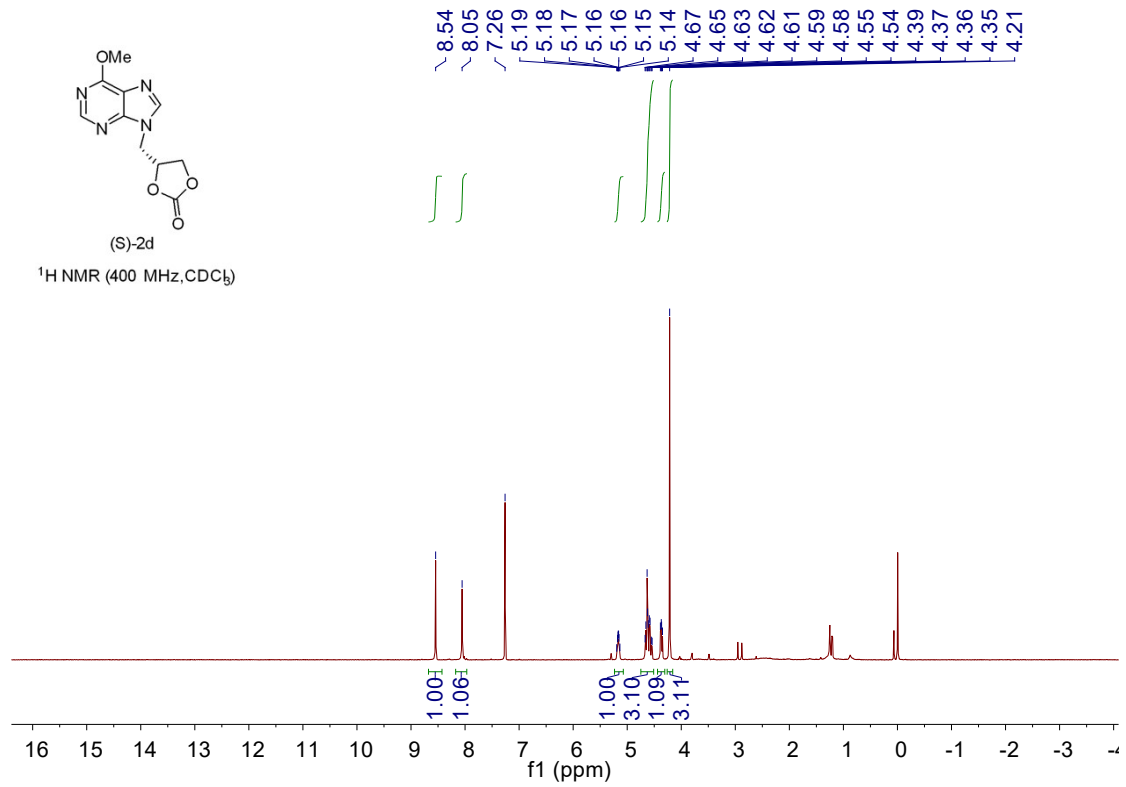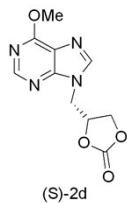

(S)-2d

<sup>13</sup>C NMR (100 MHz, CDCl<sub>3</sub>)

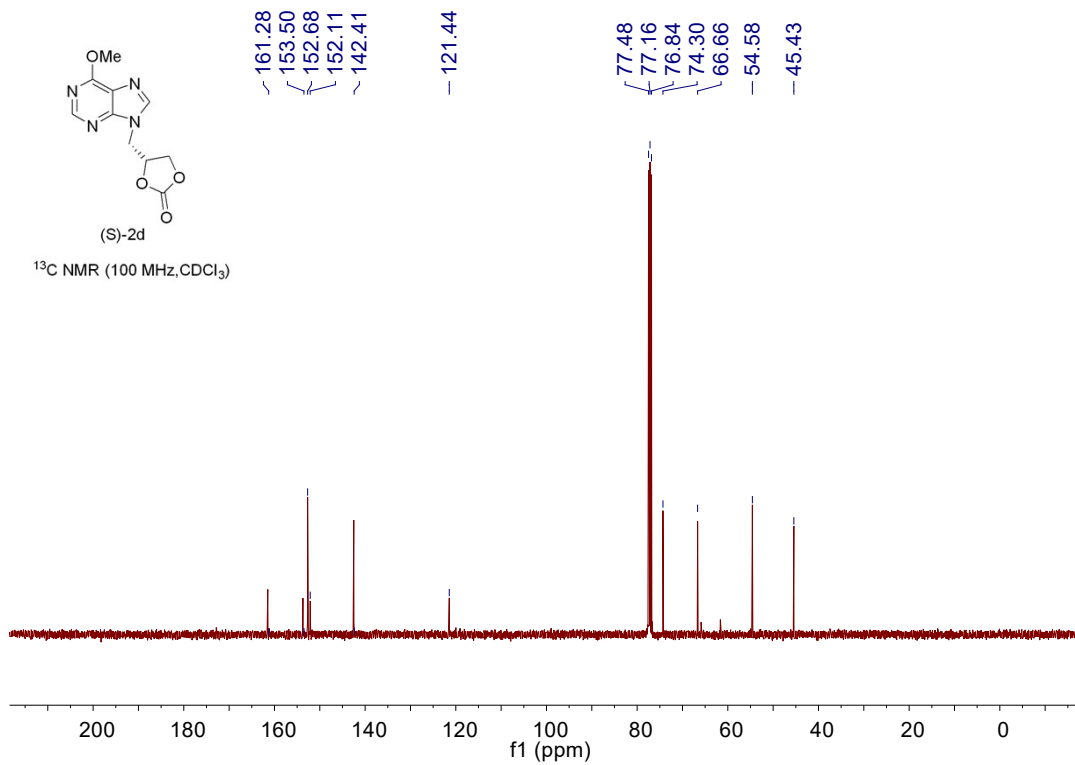

04252021-mxn-NMe

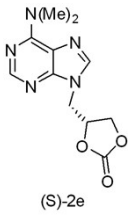

<sup>1</sup>H NMR (400 MHz, CDCl<sub>3</sub>)

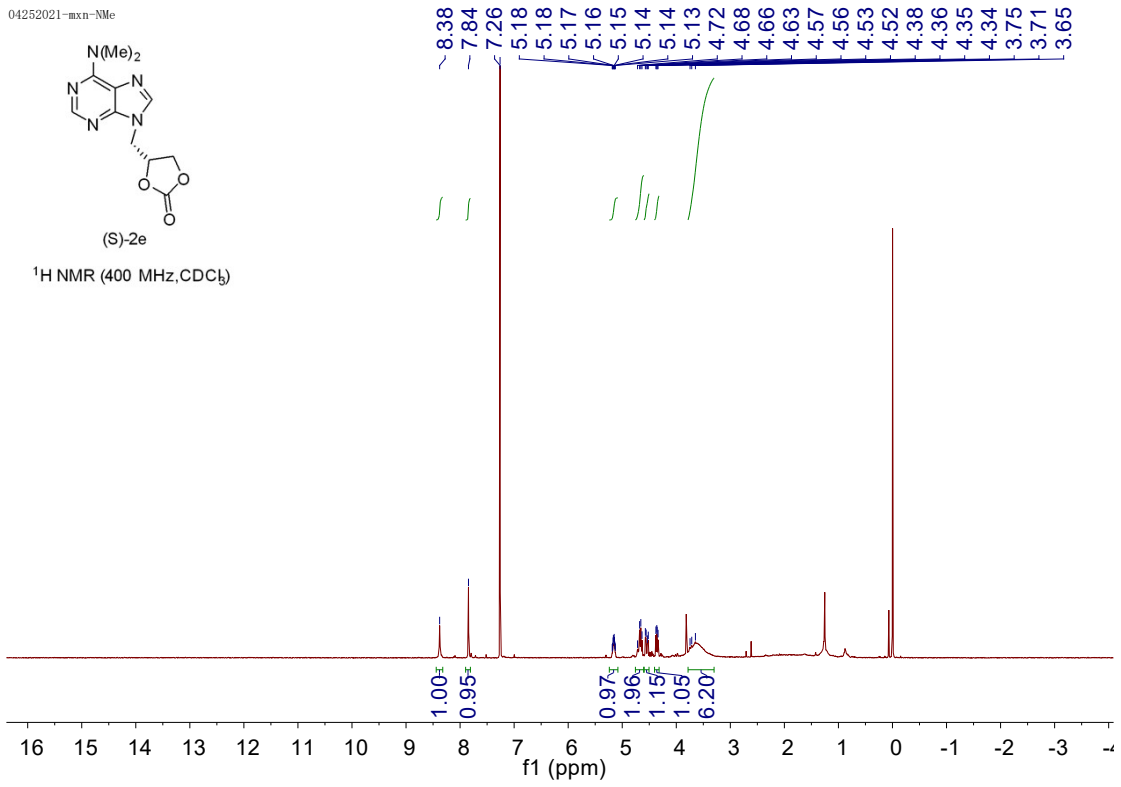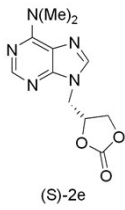

<sup>13</sup>C NMR (150 MHz, CDCl<sub>3</sub>)

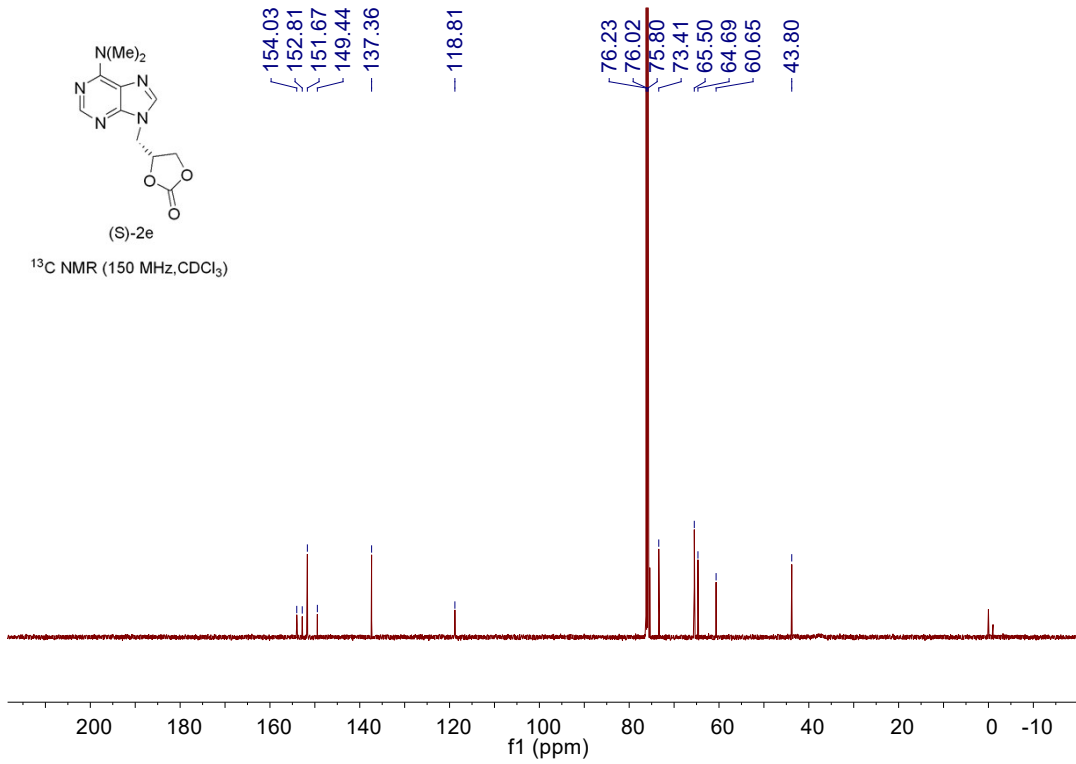

03062021-mxn-NEt

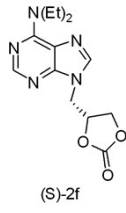

<sup>1</sup>H NMR (400 MHz, CDCl<sub>3</sub>)

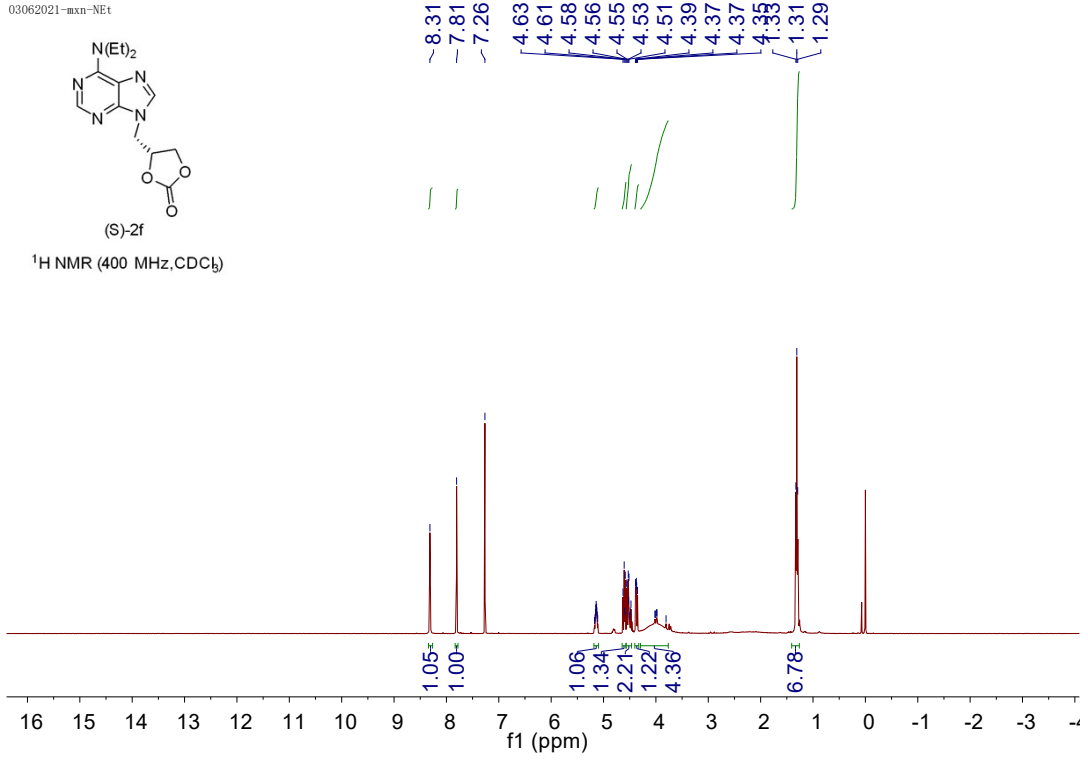

10282021-mxn-net-zhi

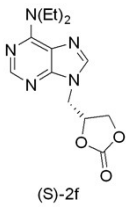

<sup>13</sup>C NMR (100 MHz, CDCl<sub>3</sub>)

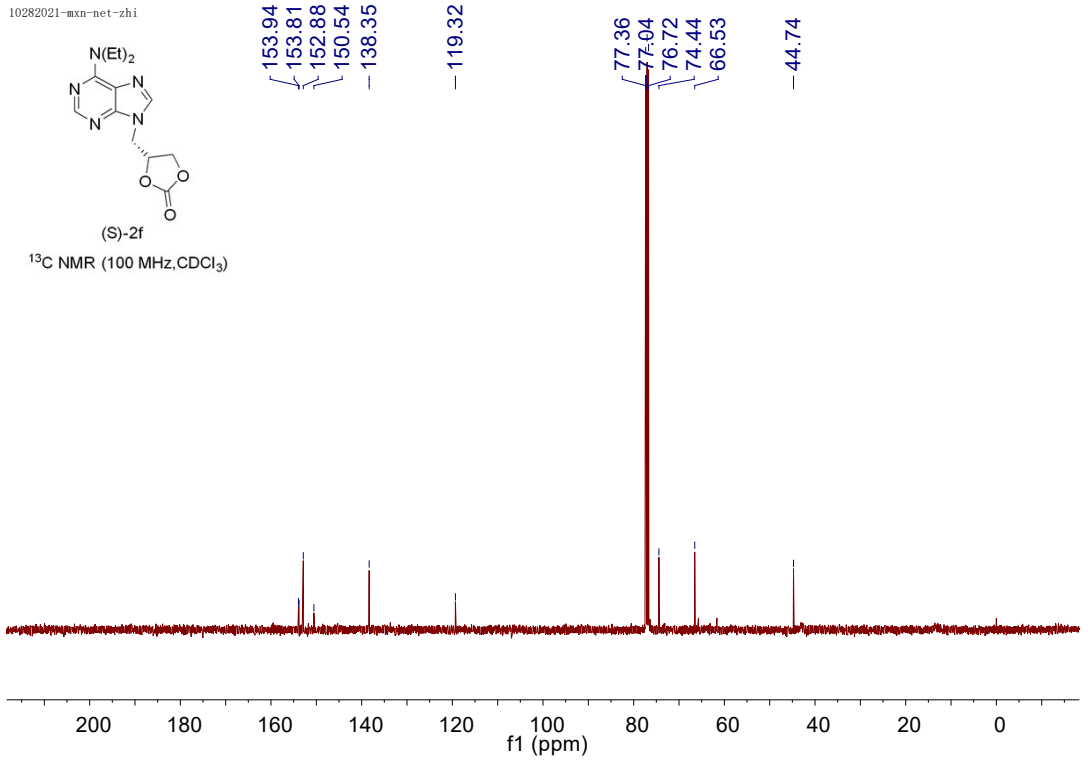

05022021-mxn-Br

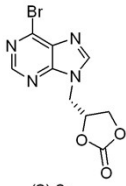

(S)-2g

<sup>1</sup>H NMR (400 MHz, CDCl<sub>3</sub>)

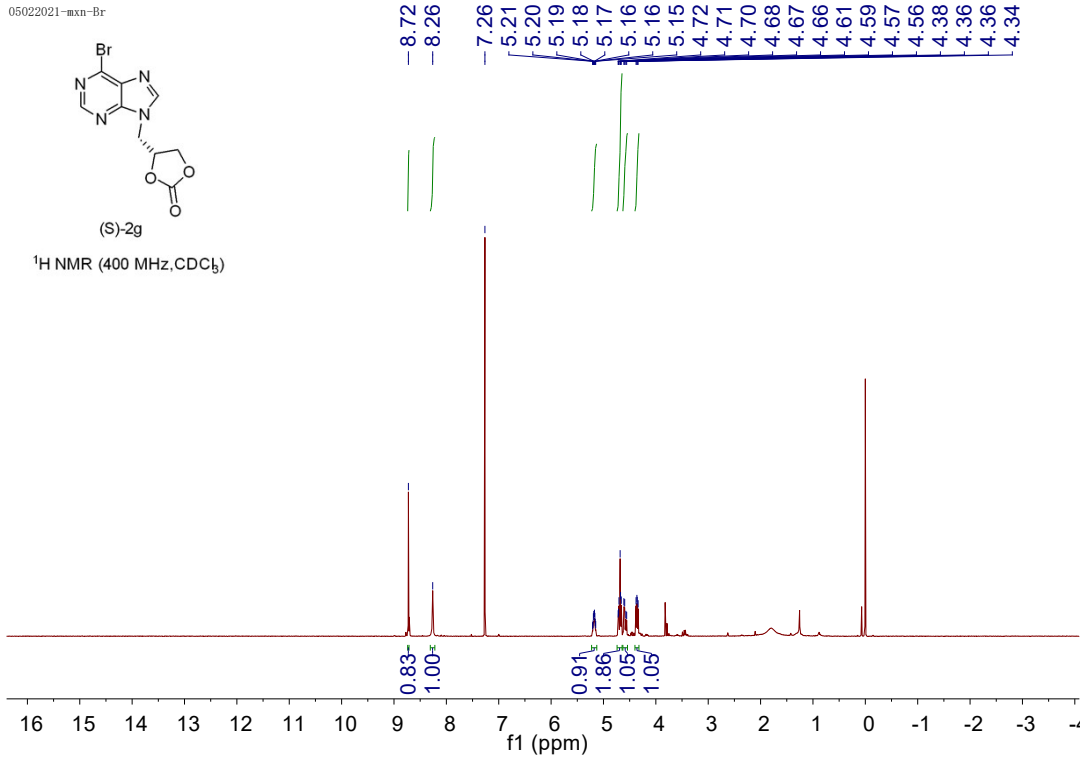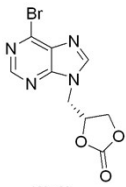

(S)-2h

<sup>1</sup>H NMR (100 MHz, CDCl<sub>3</sub>)

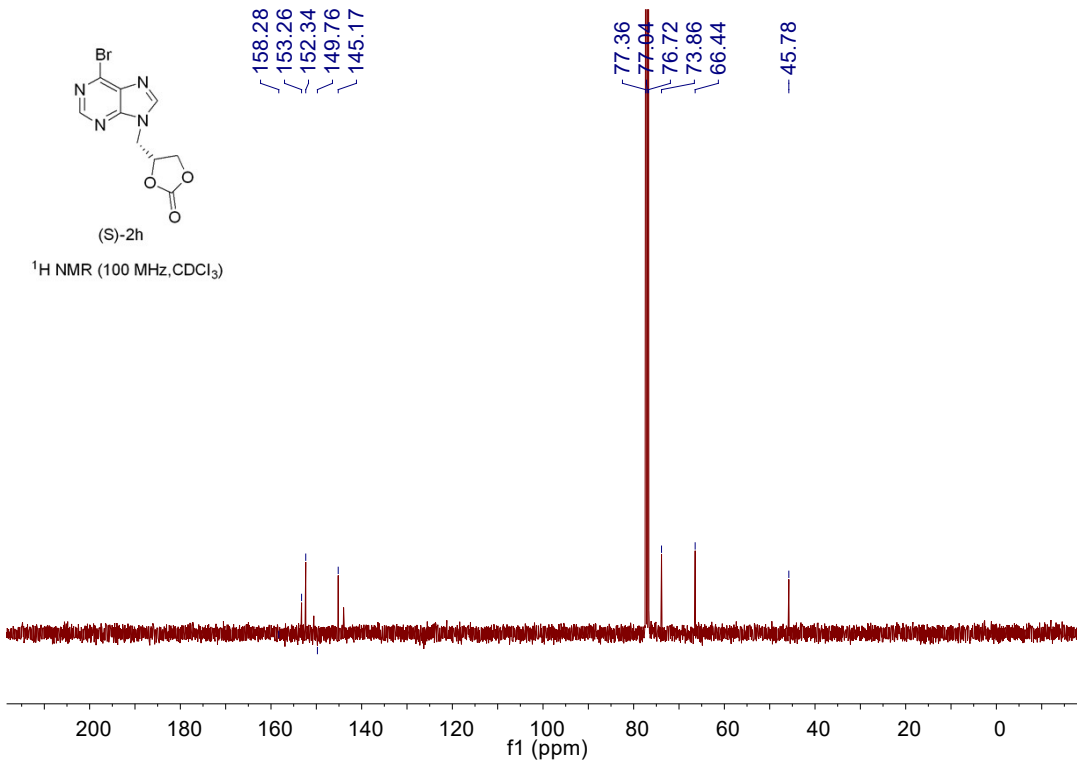

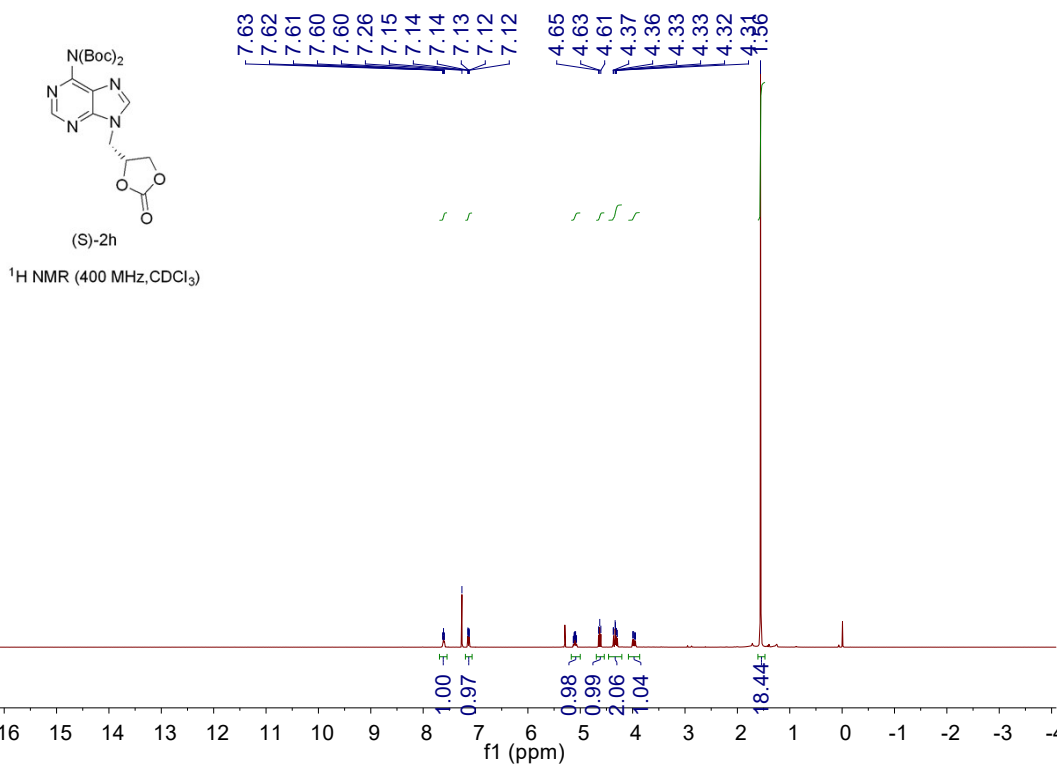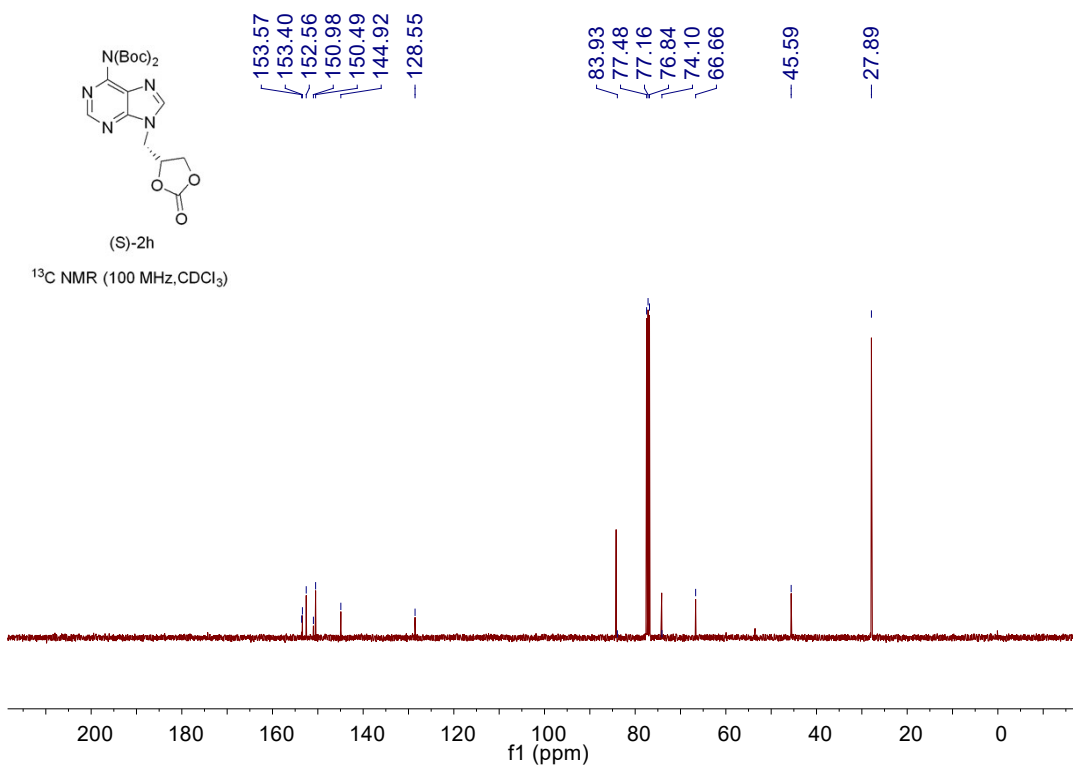

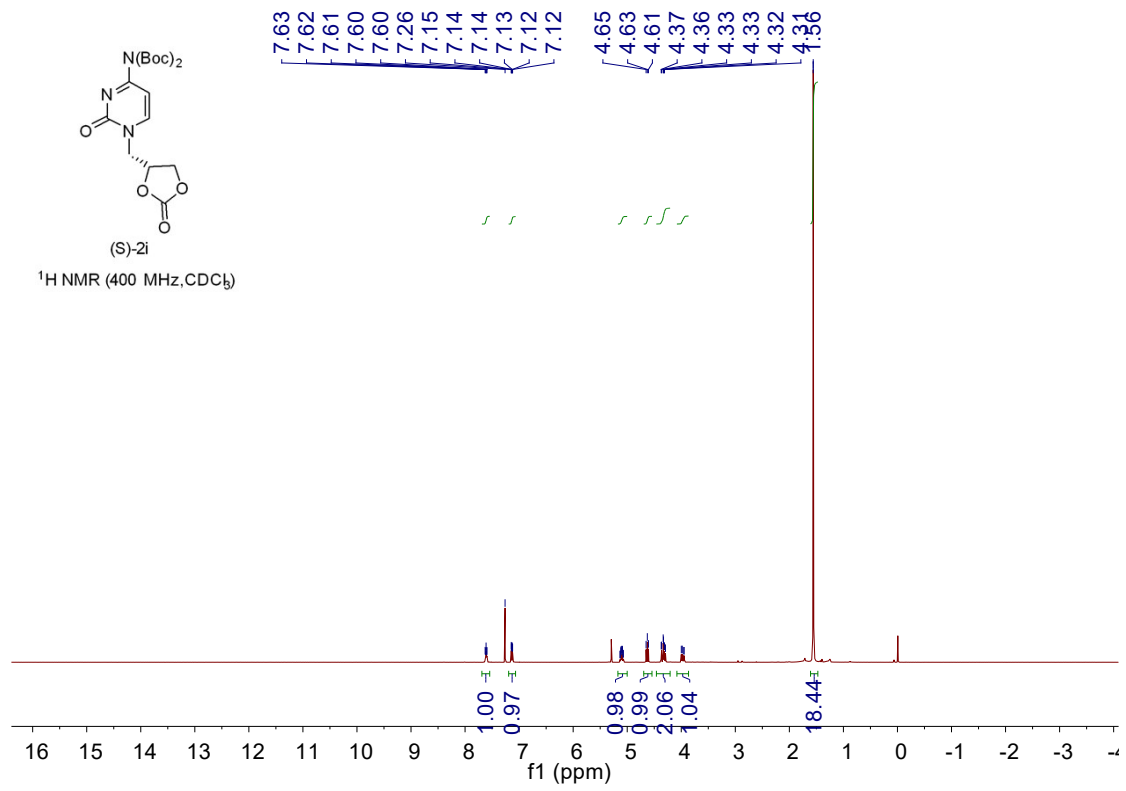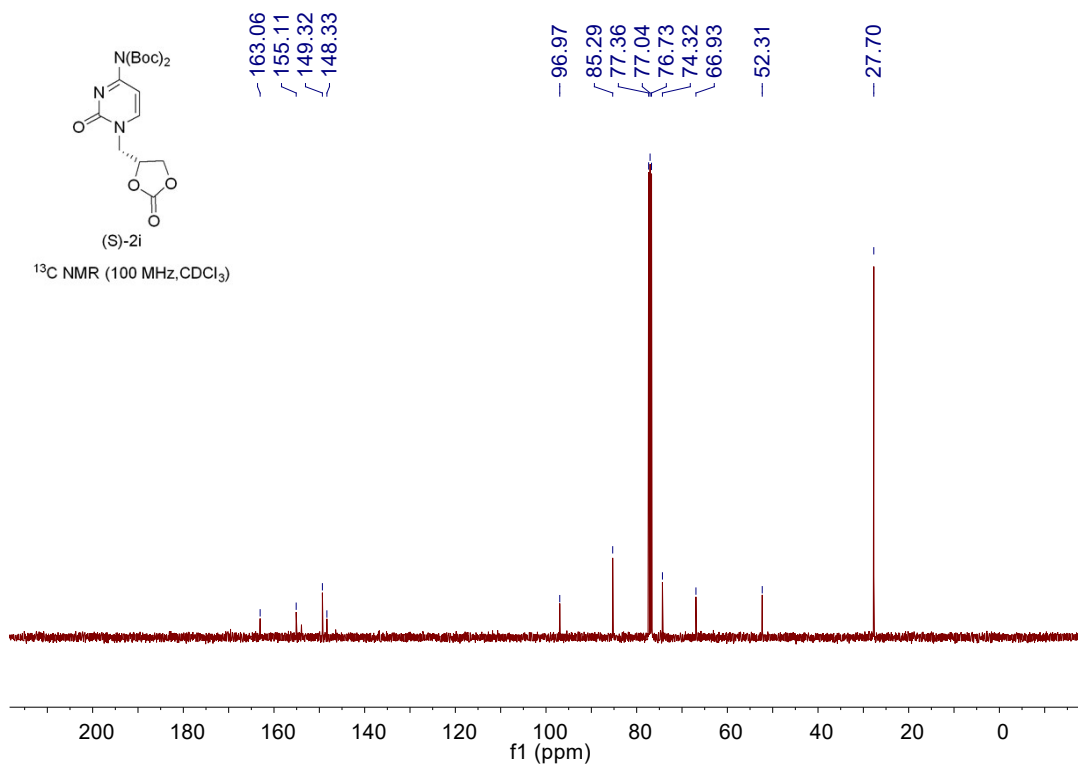

Ju130-2021-mxn-bz-zhi

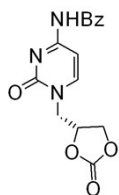

(S)-2j

<sup>1</sup>H NMR (600 MHz, DMSO)

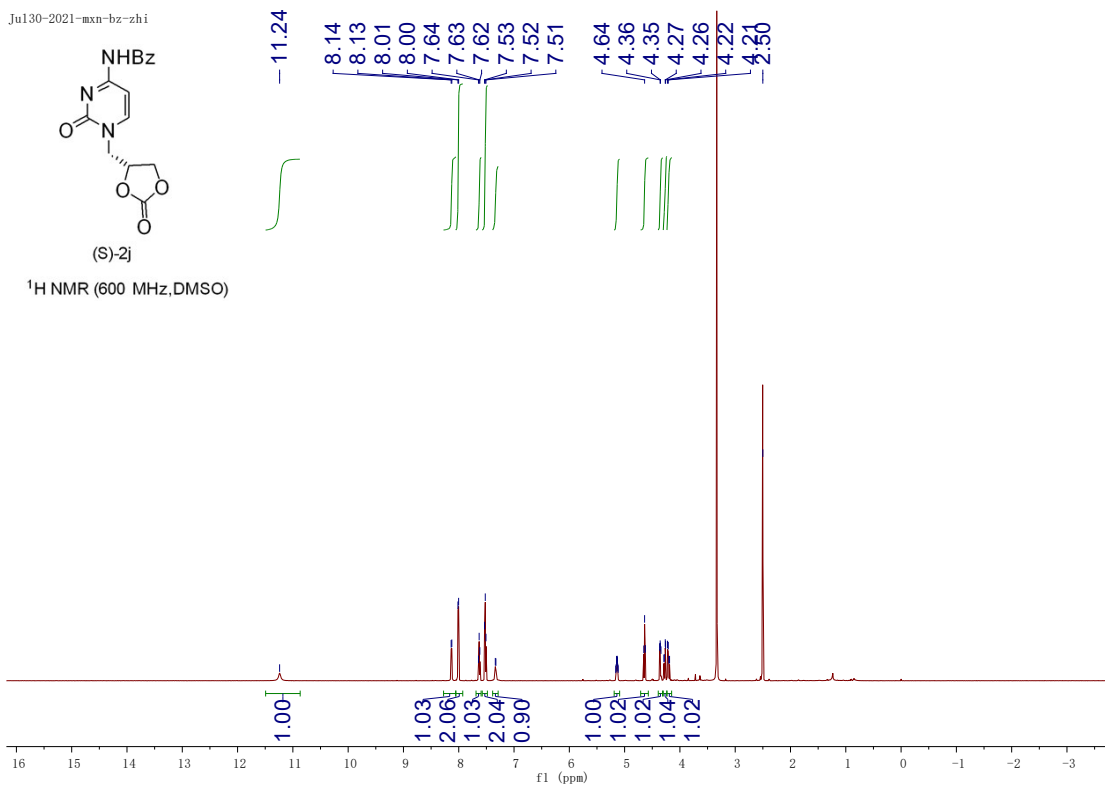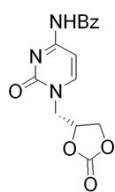

(S)-2j

<sup>13</sup>C NMR (150 MHz, DMSO)

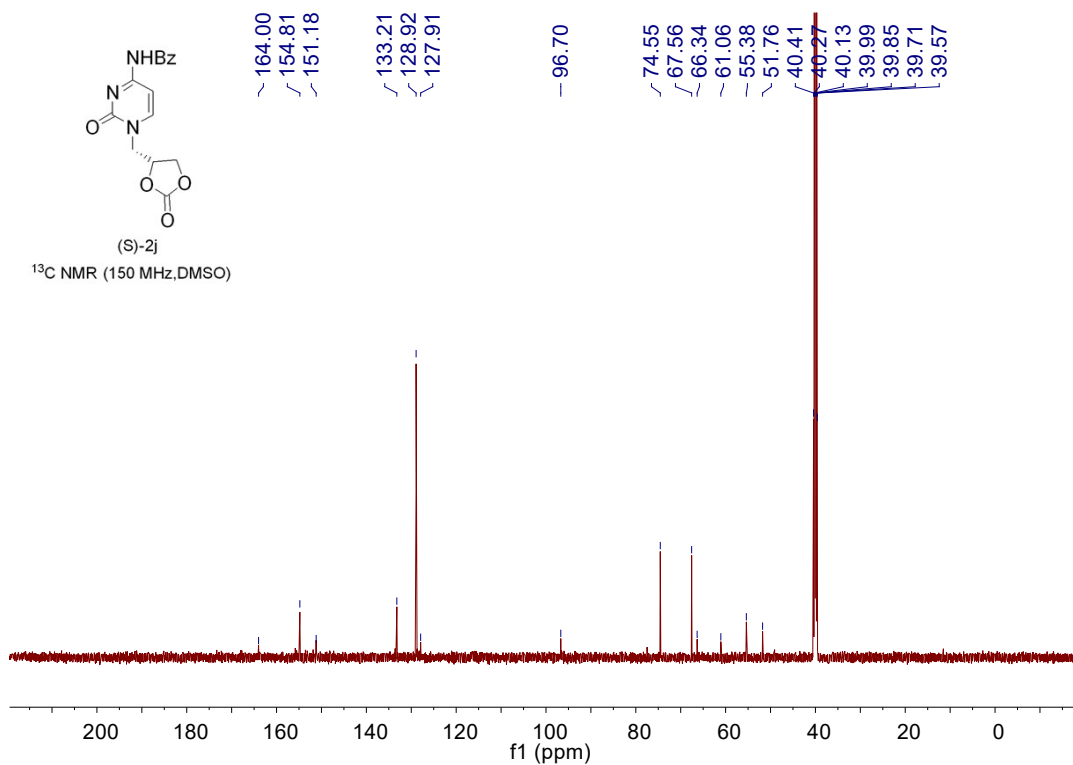

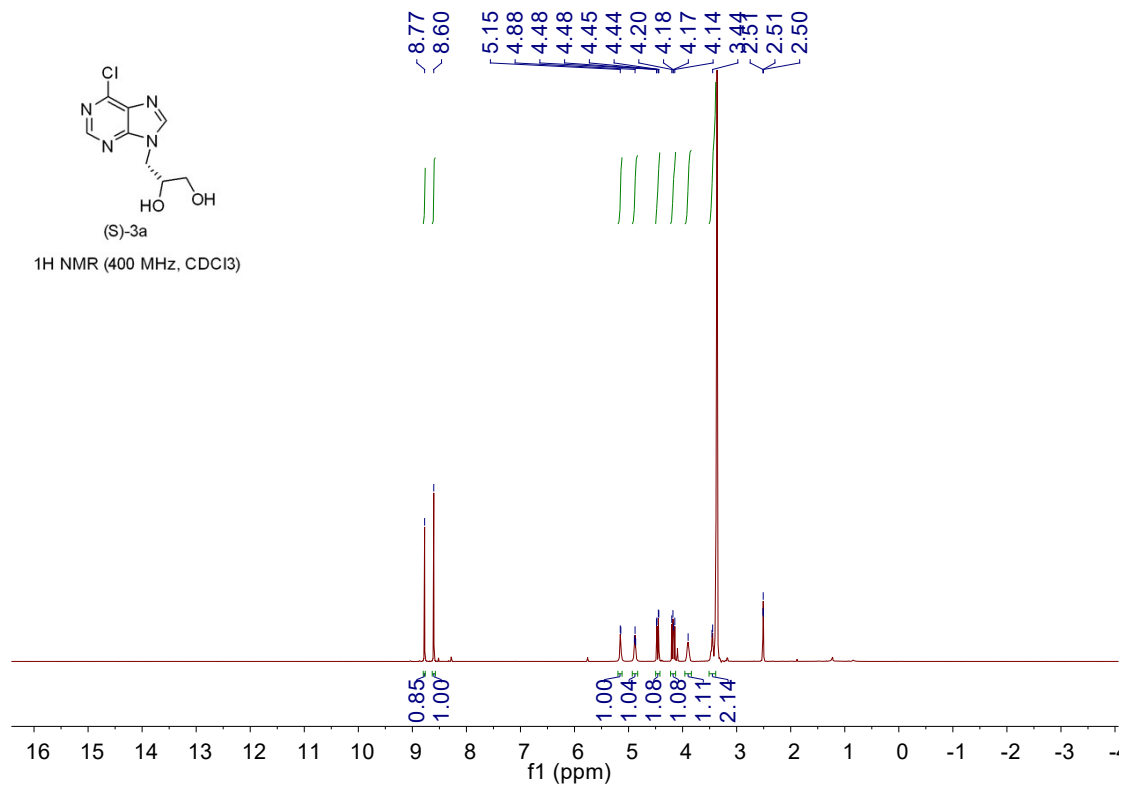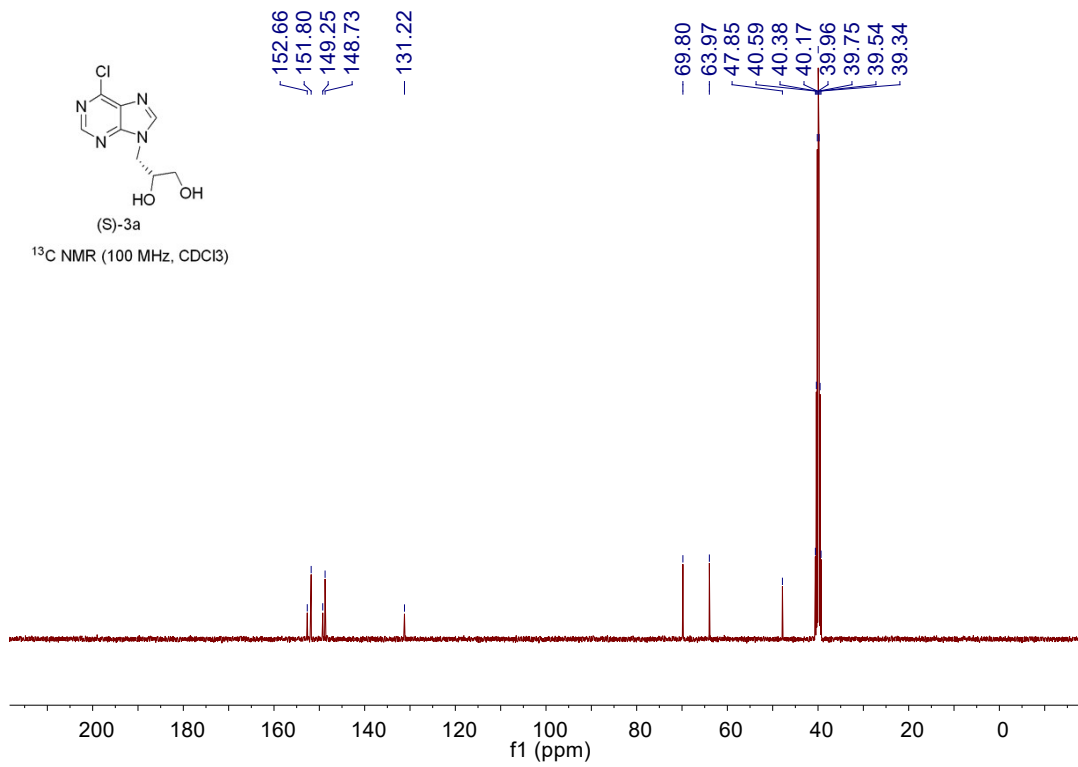



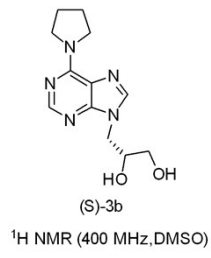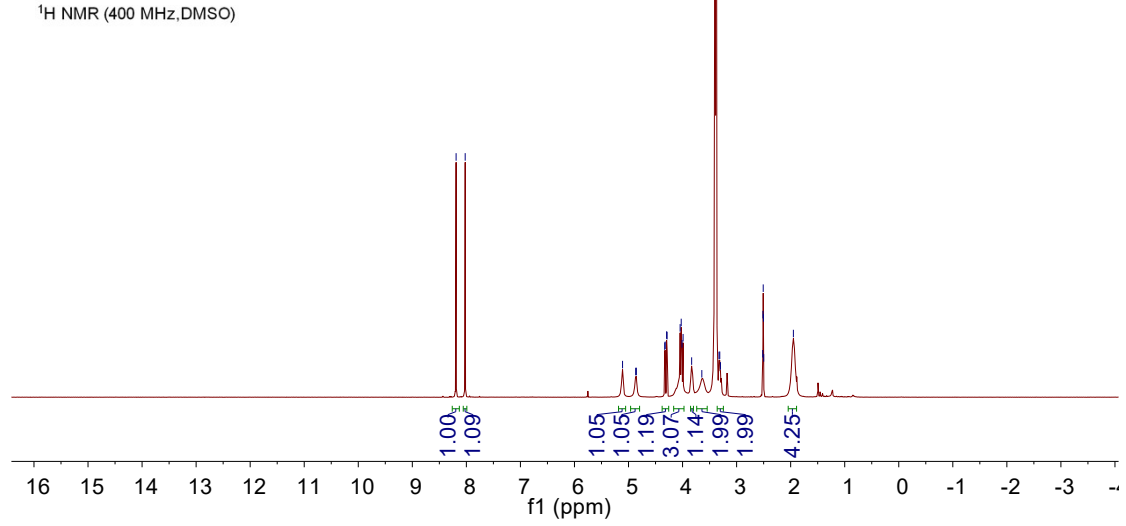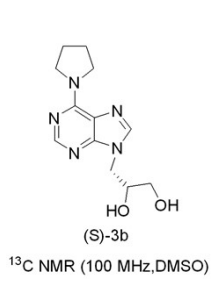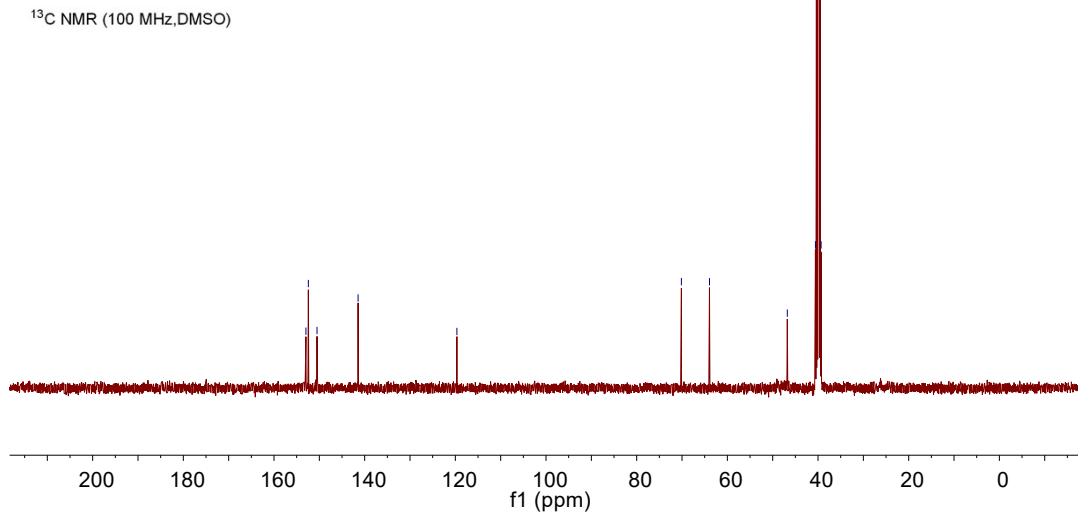

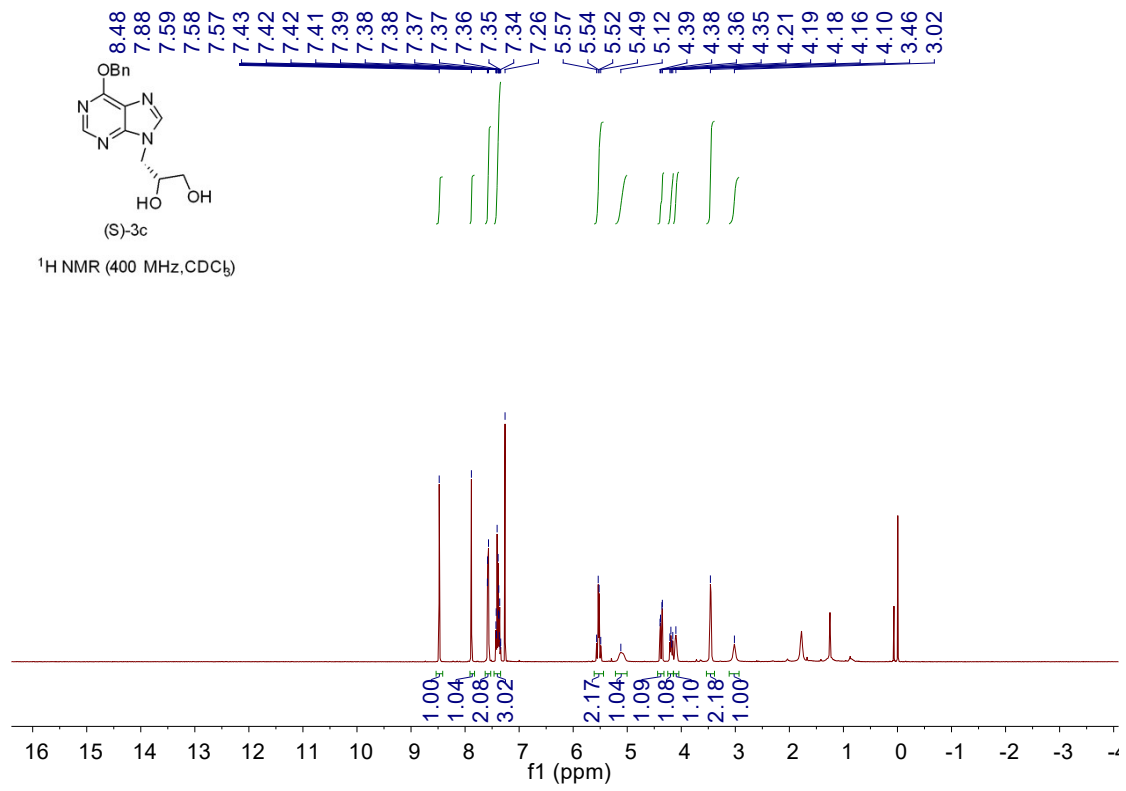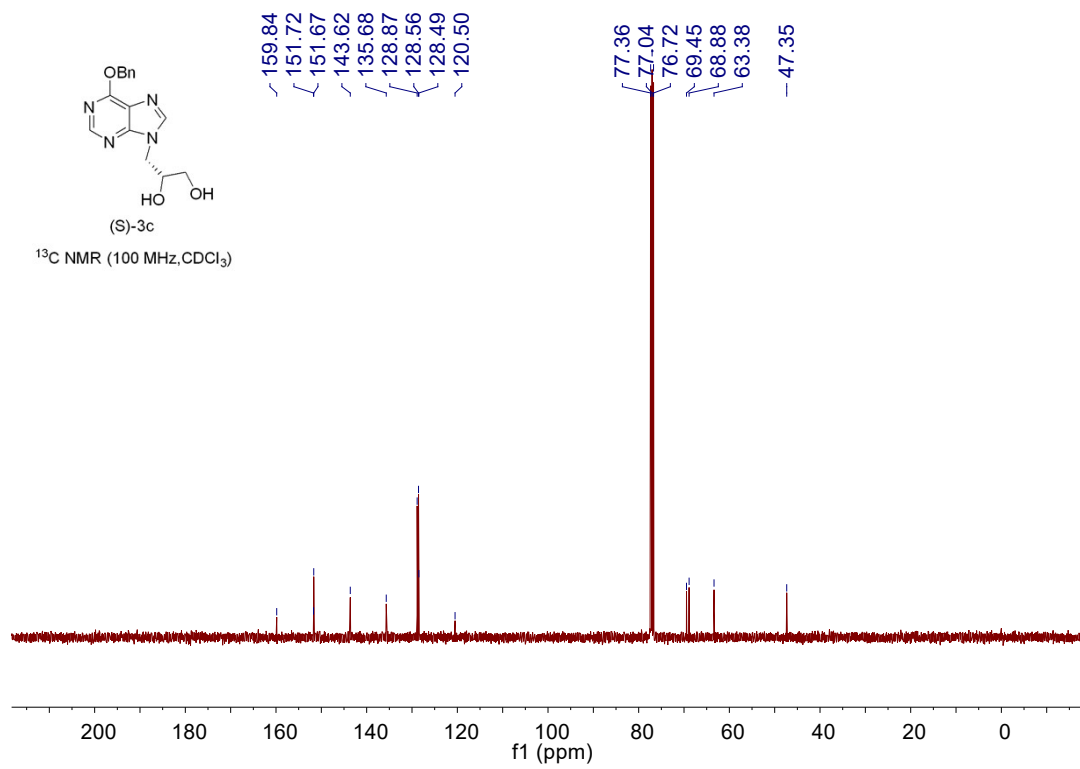

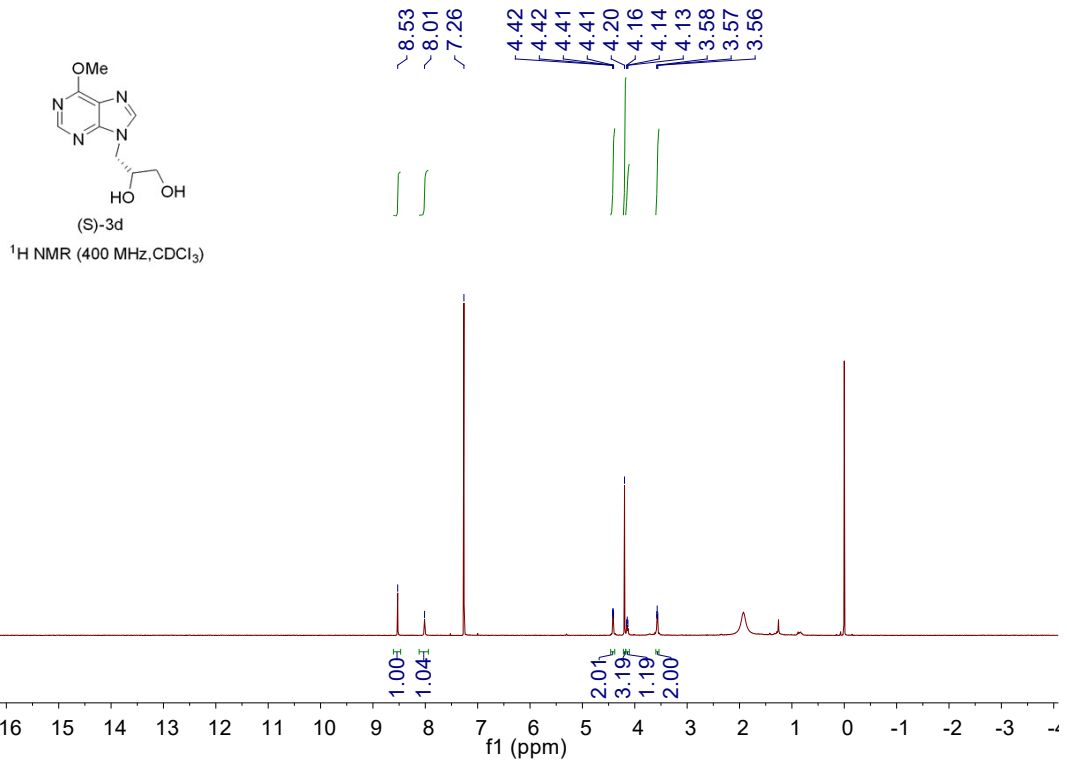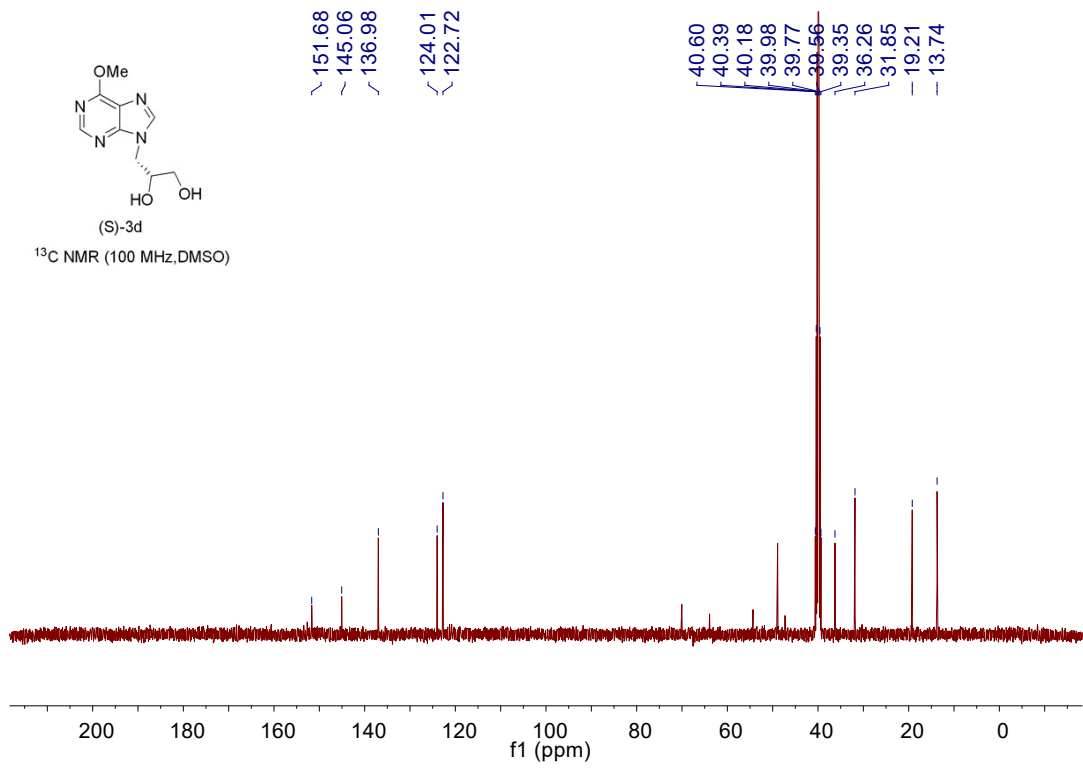

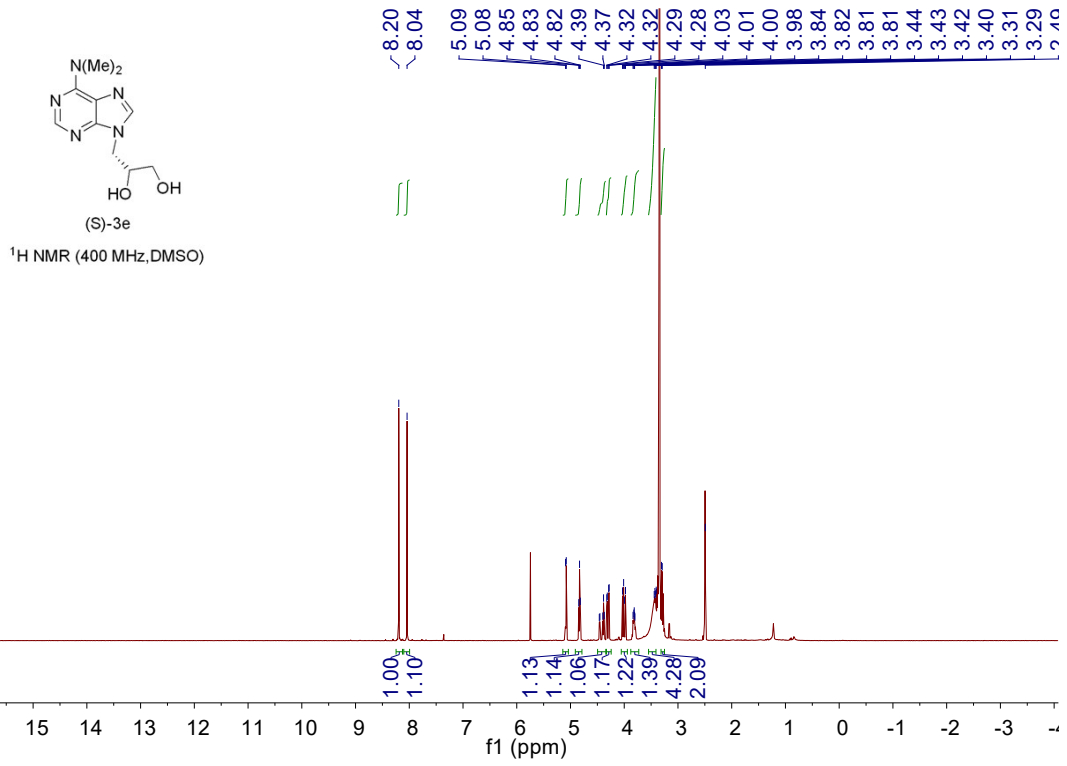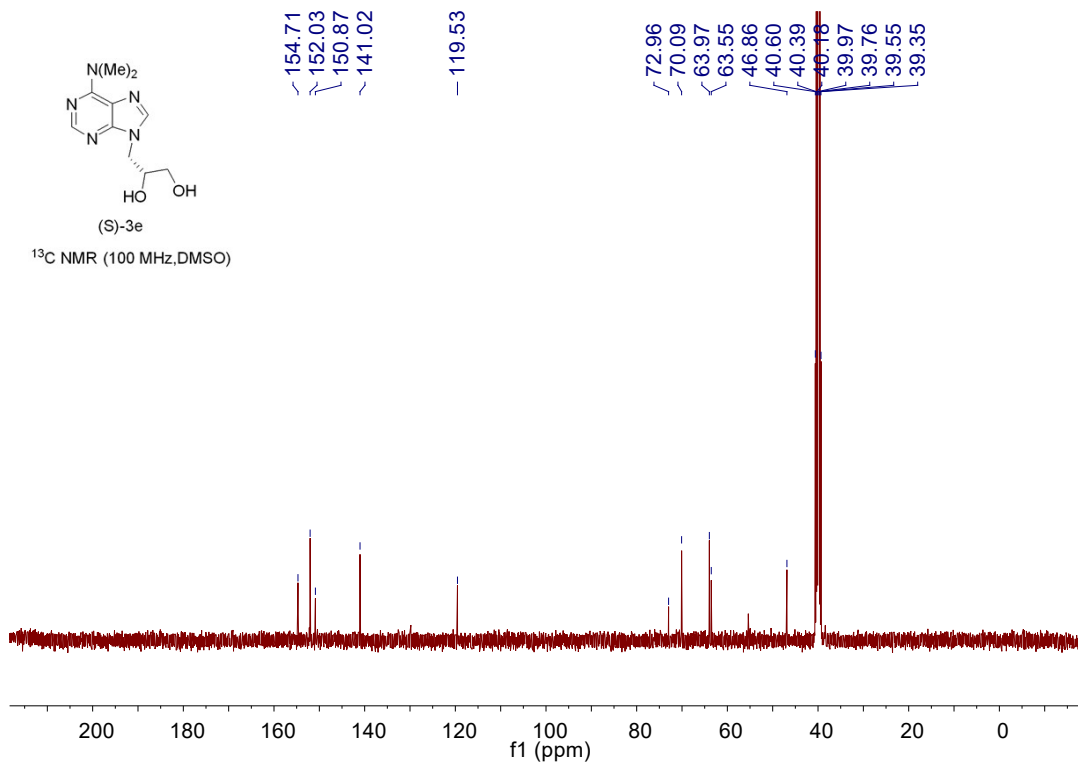

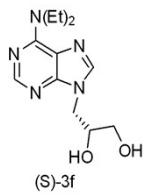

<sup>1</sup>H NMR (400 MHz, DMSO)

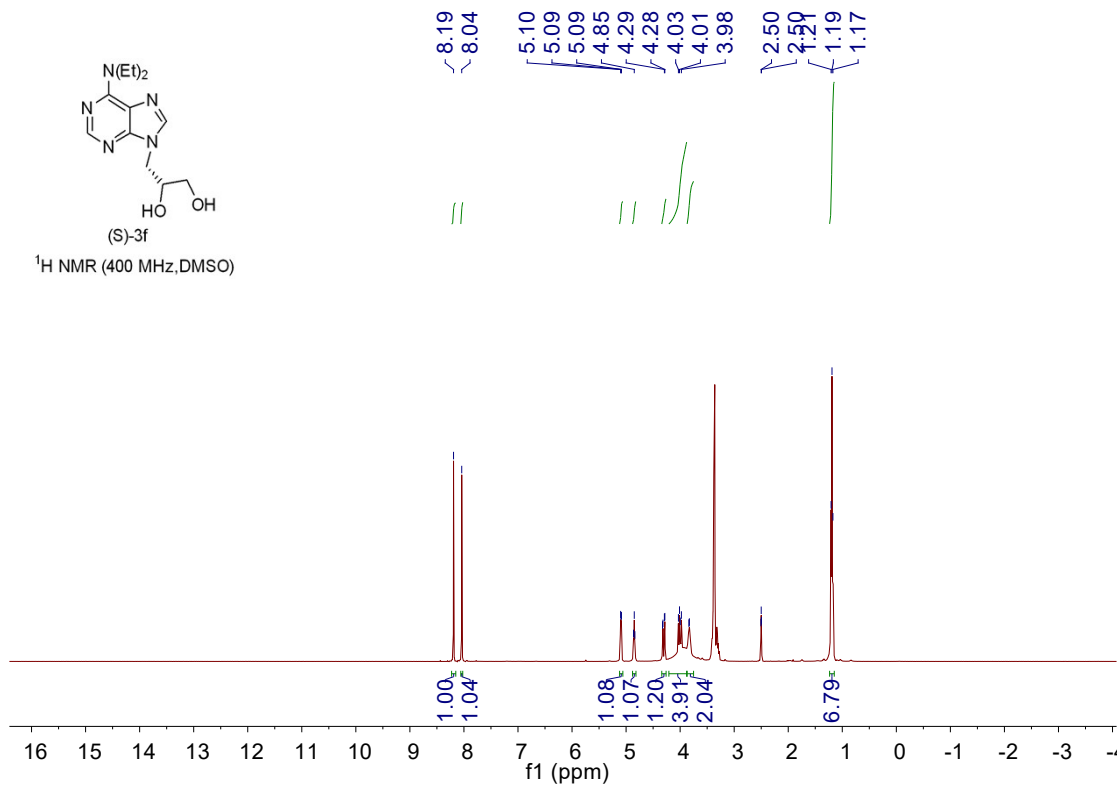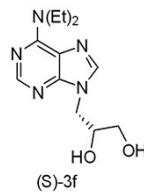

<sup>13</sup>C NMR (400 MHz, DMSO)

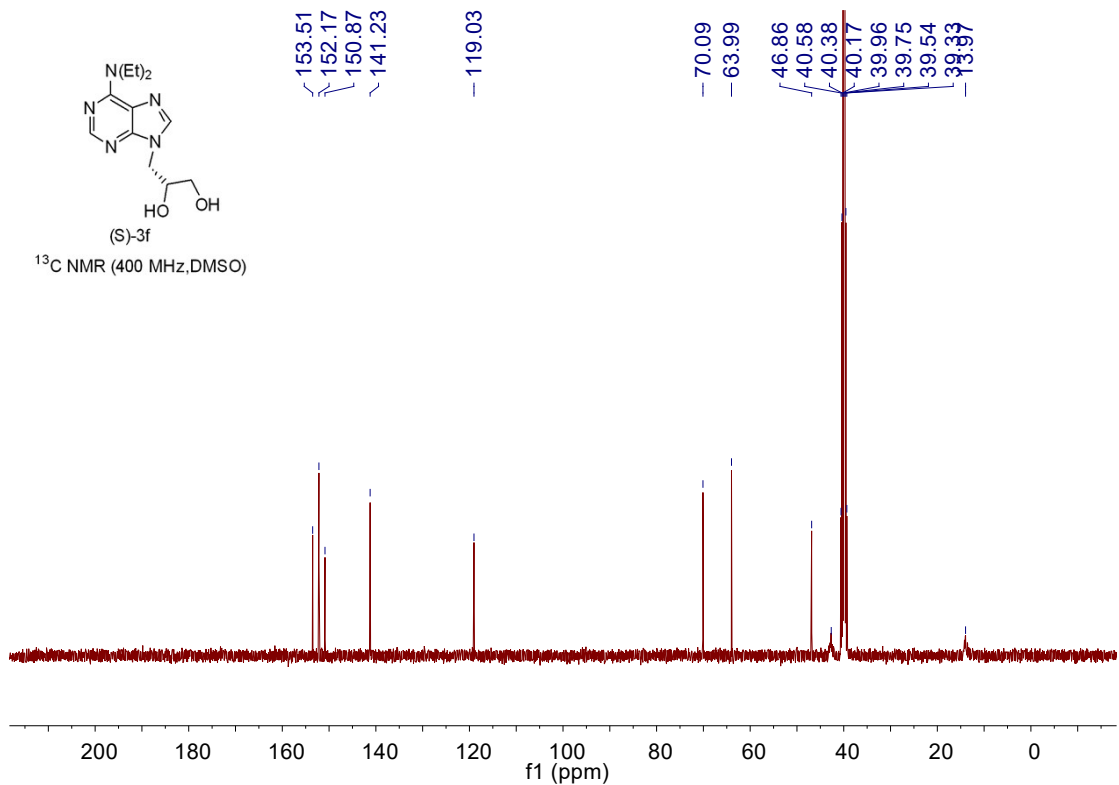

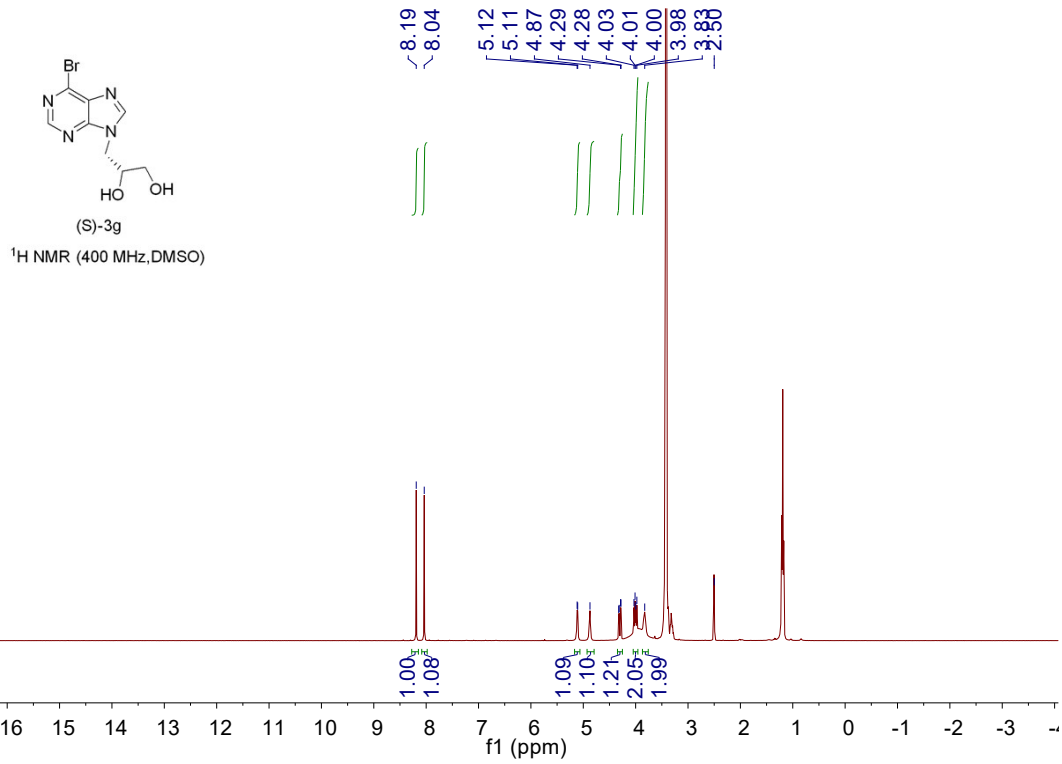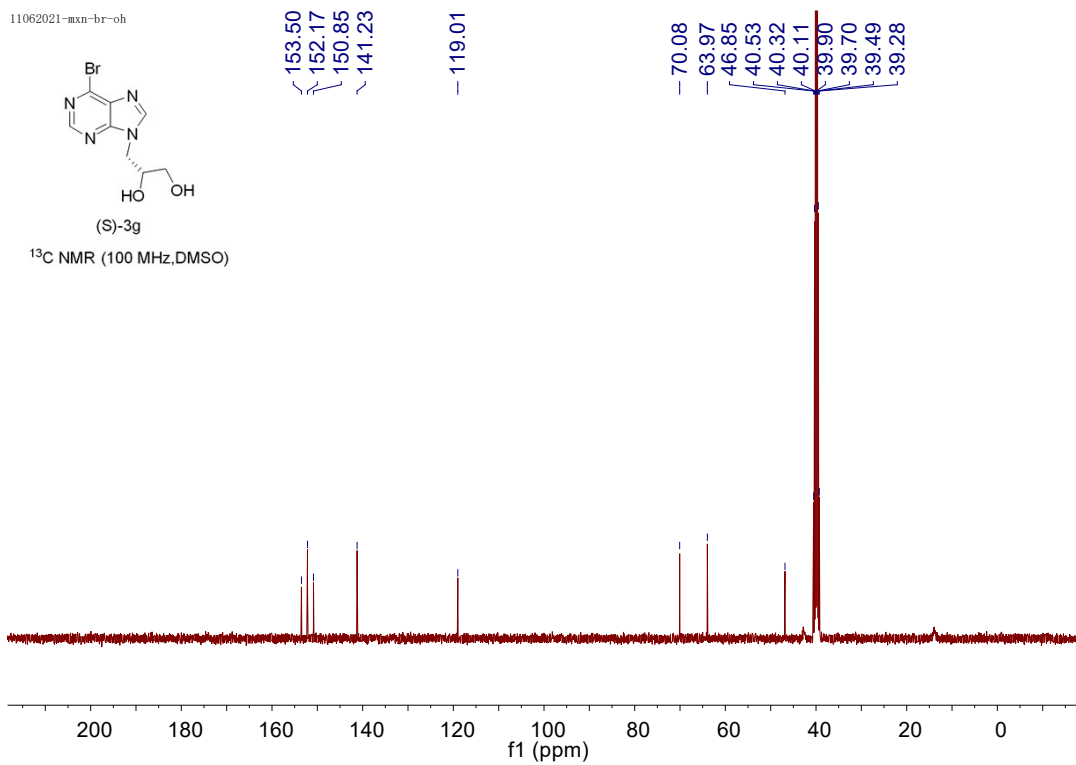

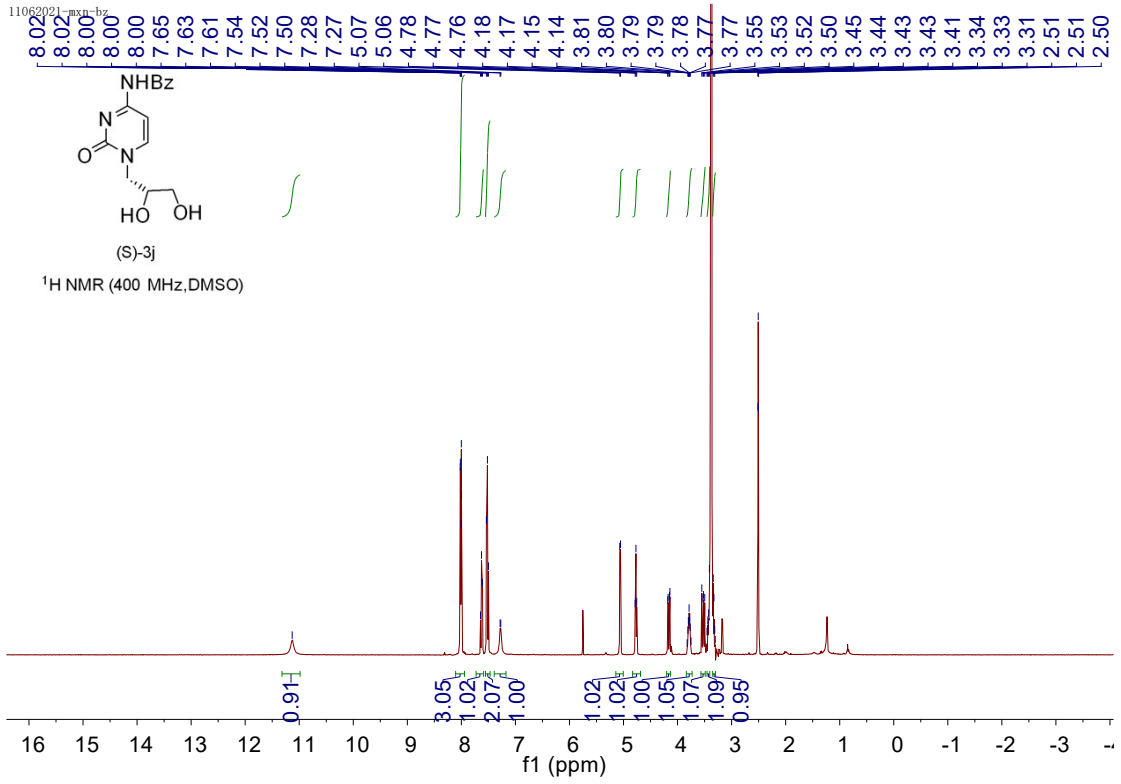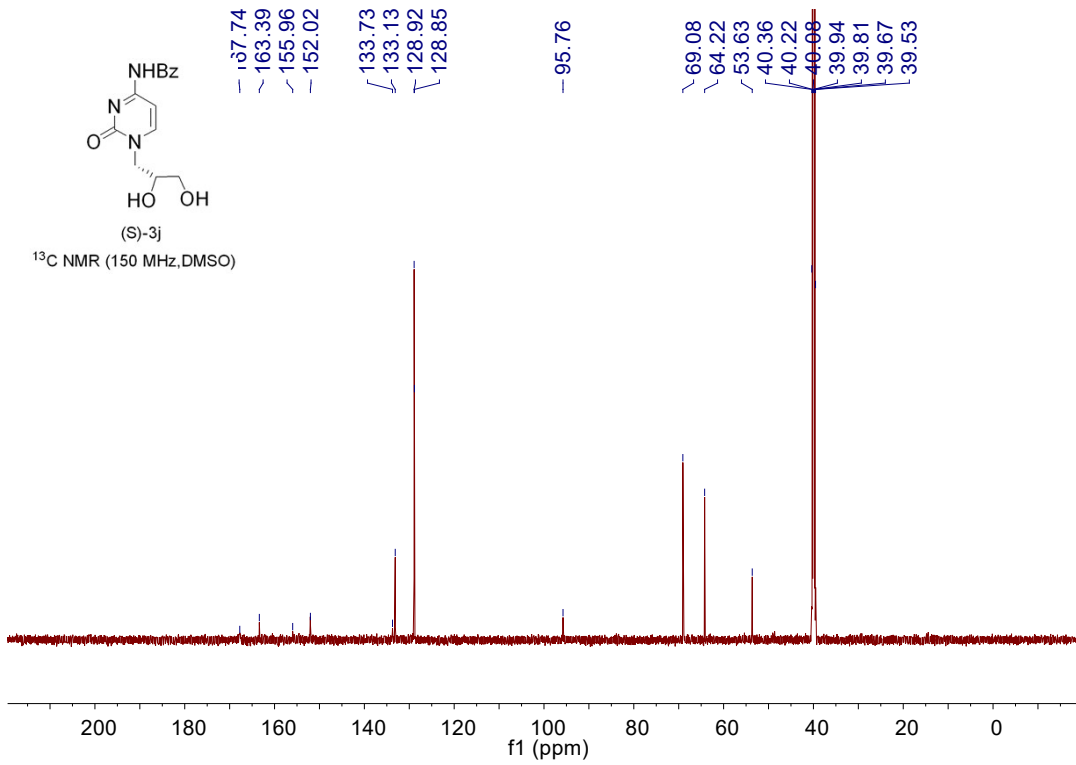

HPLC data

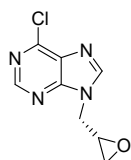

(S)-1a

HPLC chromatograms (Daicel chiralpak OD, Hexanes/i-PrOH = 70:30, flow rate = 1 mL/min):  
12.5 min (minor), 14.2 min (major), >99% ee

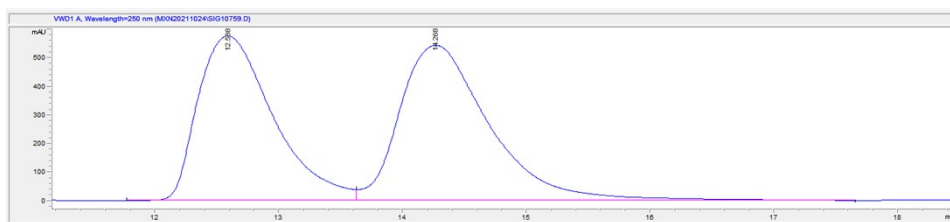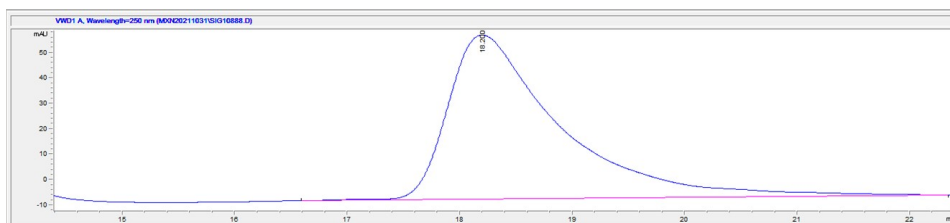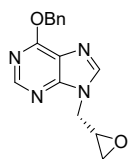

(S)-1c

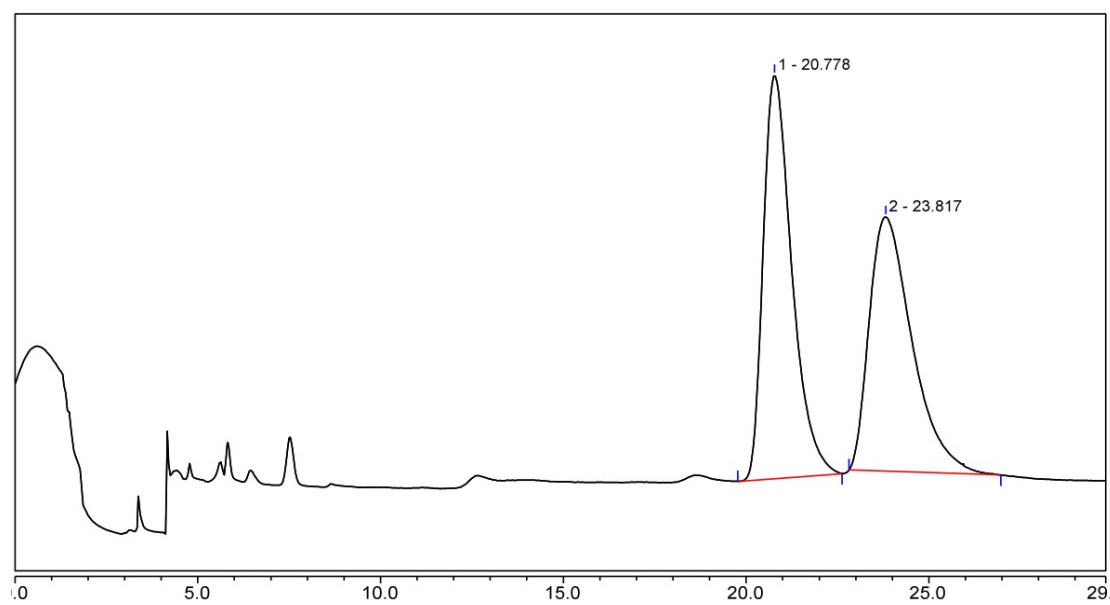

HPLC chromatograms (Daicel chiralpak OD, Hexanes/i-PrOH = 70:30, flow rate = 1 mL/min):  
30.3 min (minor), 36.8 min (major), >99% ee



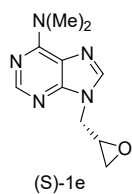

HPLC chromatograms (Daicel chiralpak OJ, Hexanes/i-PrOH = 85:15, flow rate = 1 mL/min):  
20.7 min (minor), 22.8 min (major), >99% ee

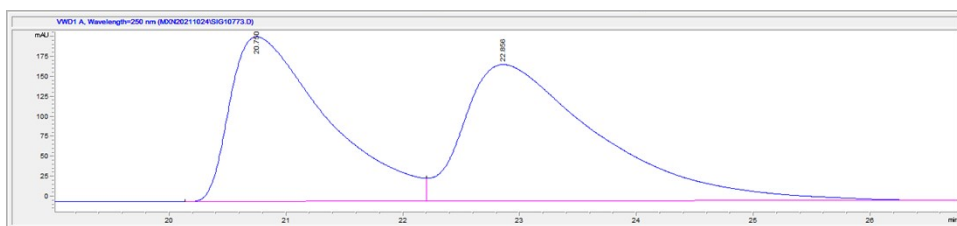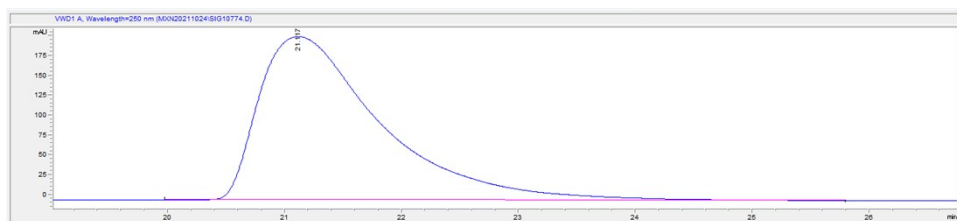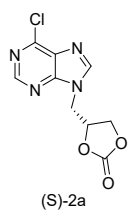

HPLC chromatograms (Daicel chiralpak OD, Hexanes/i-PrOH = 70:30, flow rate = 1 mL/min):  
30.3 min (minor), 36.8 min (major), >99% ee

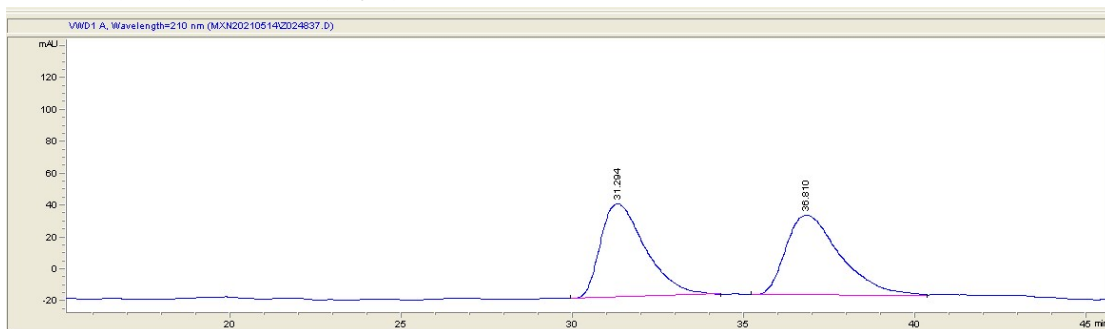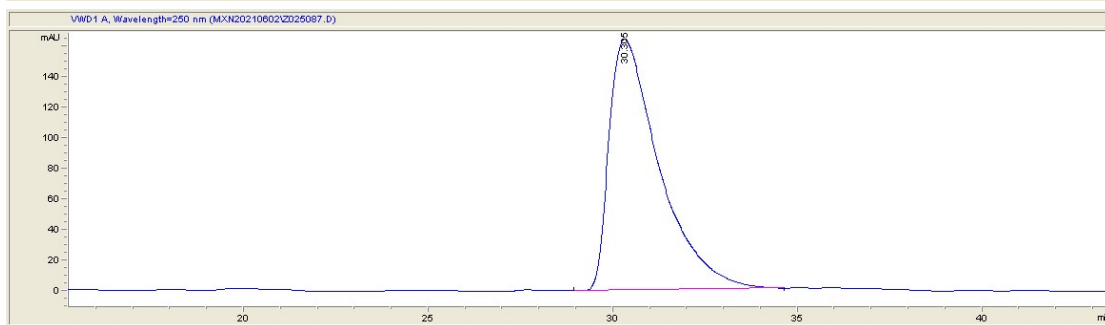

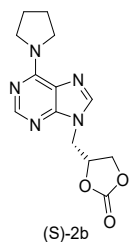

HPLC chromatograms (Daicel chiralpak AD, Hexanes/*i*-PrOH = 80:20, flow rate = 0.8 mL/min):  
17.5 min (minor), 23.5 min (major), >99% ee

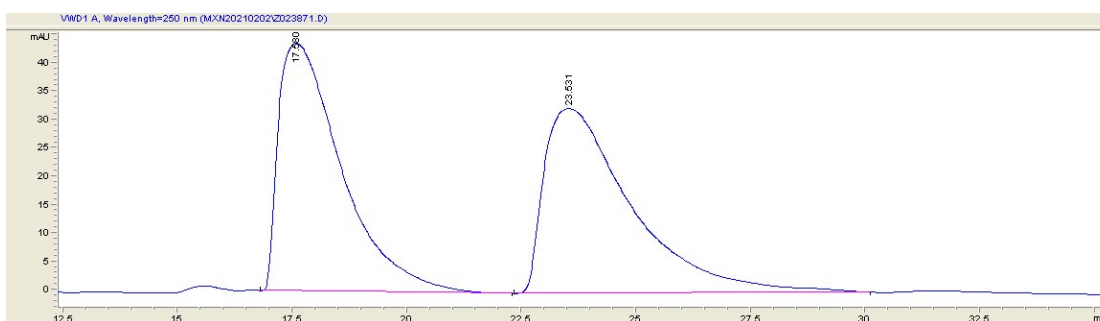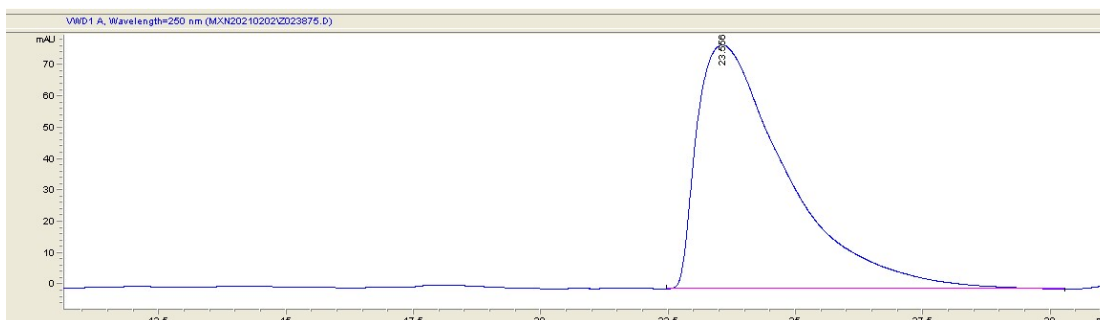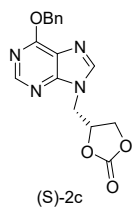

HPLC chromatograms (Daicel chiralpak OD, Hexanes/*i*-PrOH = 70:30, flow rate = 1 mL/min):  
36.2 min (minor), 41.3 min (major), >99% ee

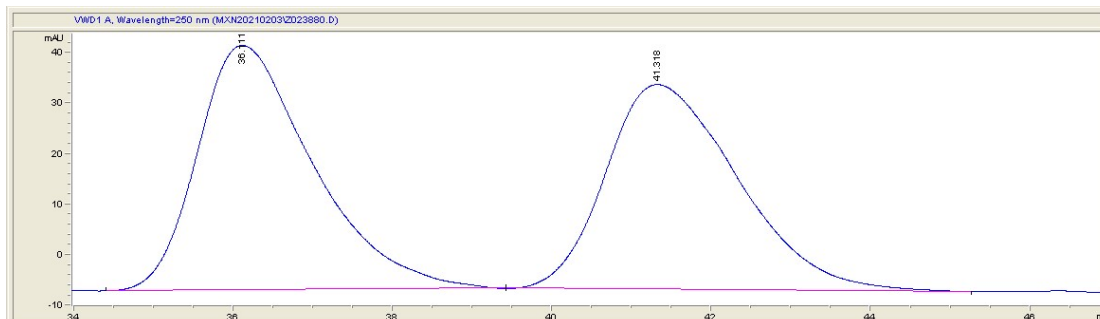

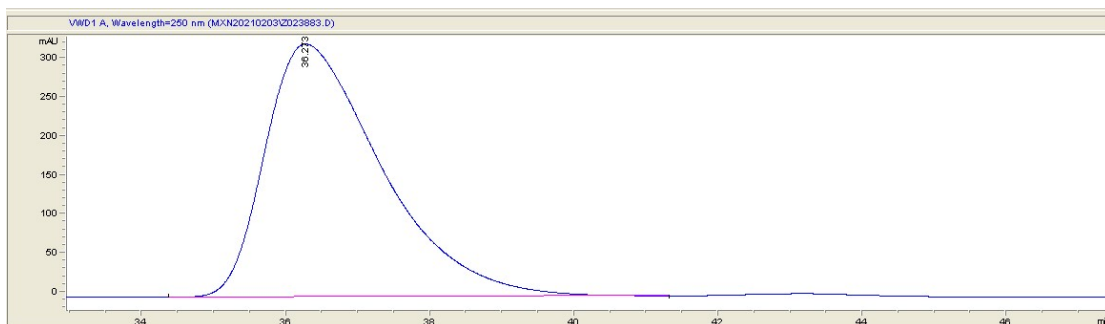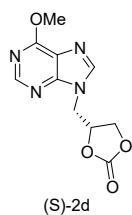

HPLC chromatograms (Daicel chiralpak OD, Hexanes/*i*-PrOH = 70:30, flow rate = 1 mL/min):  
 33.1 min (minor), 38.2 min (major), >99% ee

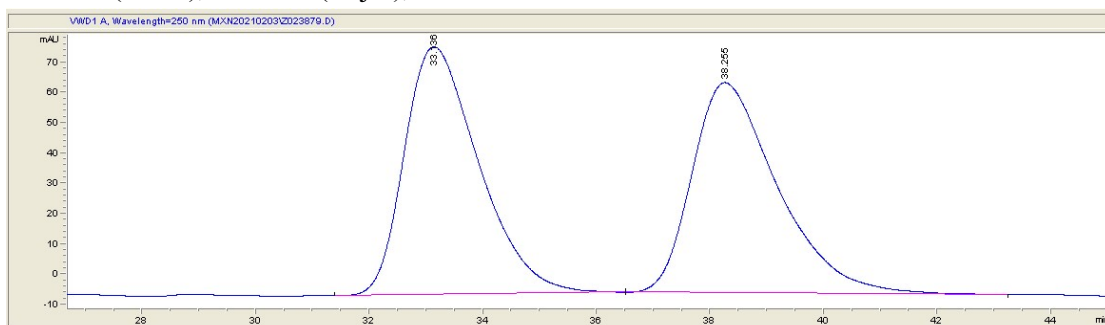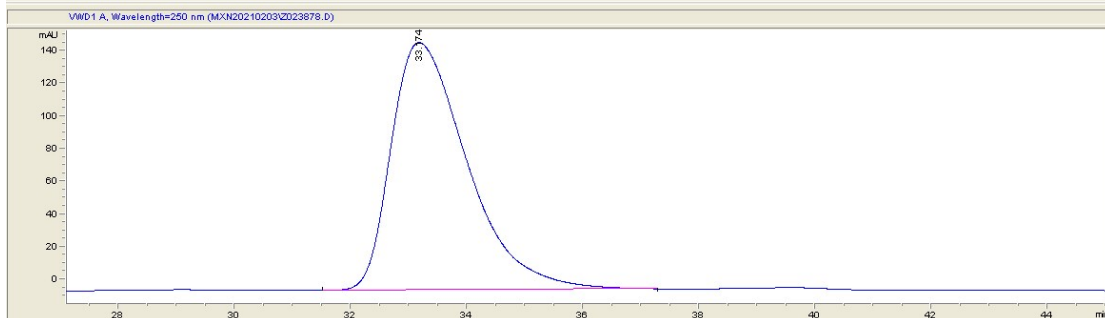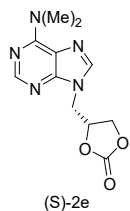

HPLC chromatograms (Daicel chiralpak OD, Hexanes/*i*-PrOH = 70:30, flow rate = 1 mL/min):  
 19.9 min (minor), 21.5 min (major), >99% ee

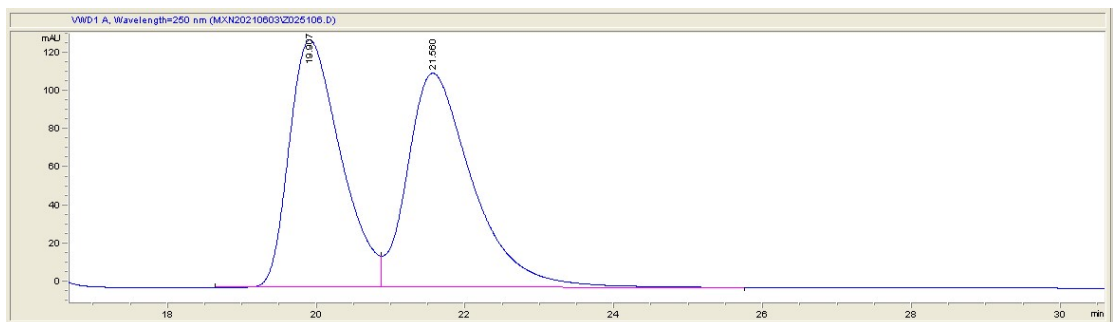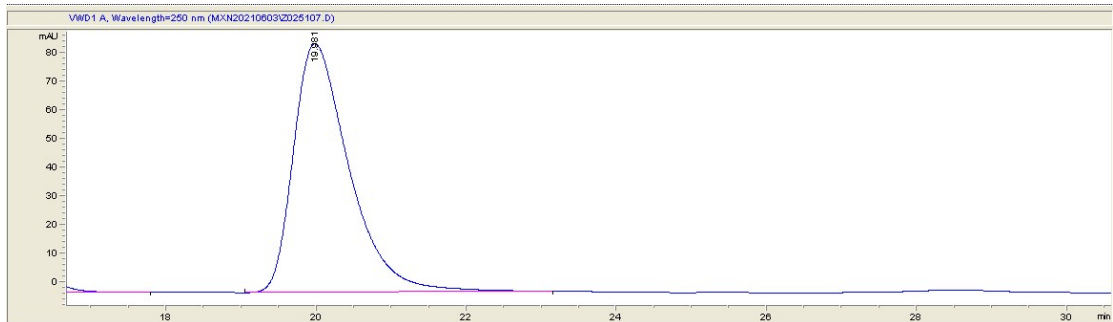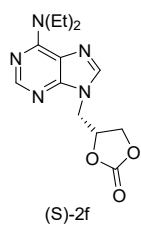

HPLC chromatograms (Daicel chiralpak OD, Hexanes/*i*-PrOH = 70:30, flow rate = 1 mL/min):  
 10.7 min (minor), 12.7 min (major), >99% ee

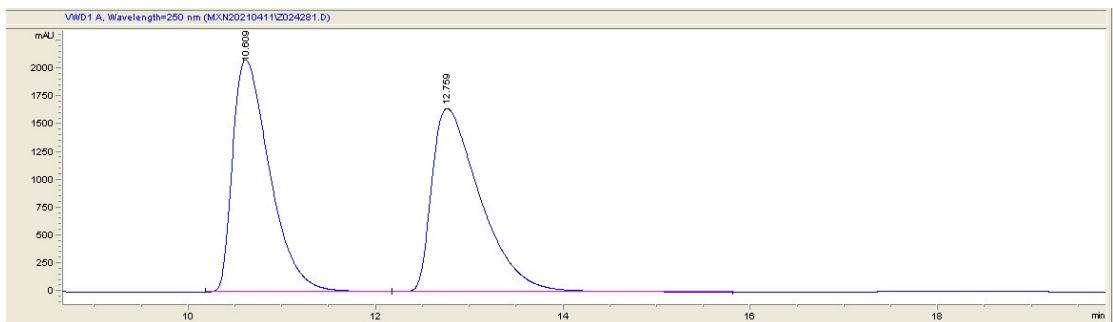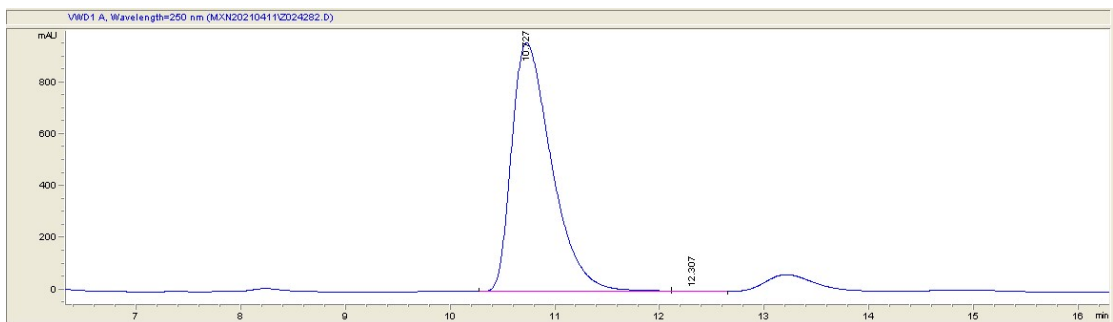

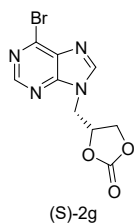

HPLC chromatograms (Daicel chiralpak OD, Hexanes/*i*-PrOH = 70:30, flow rate = 1 mL/min):  
33.4 min (minor), 41.3 min (major), >99% ee

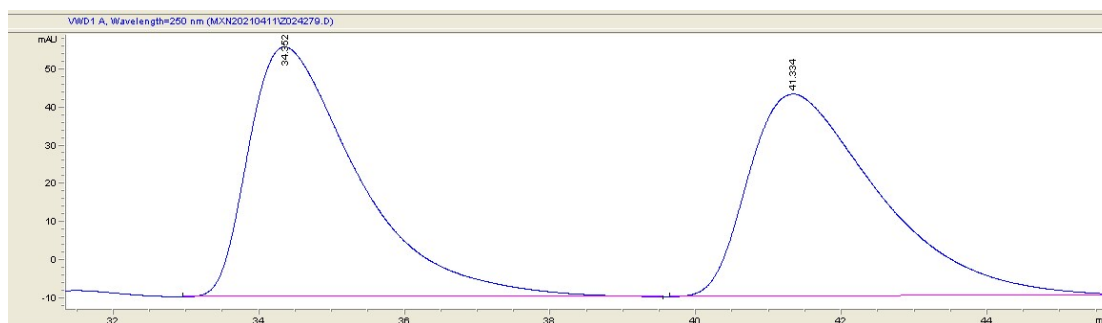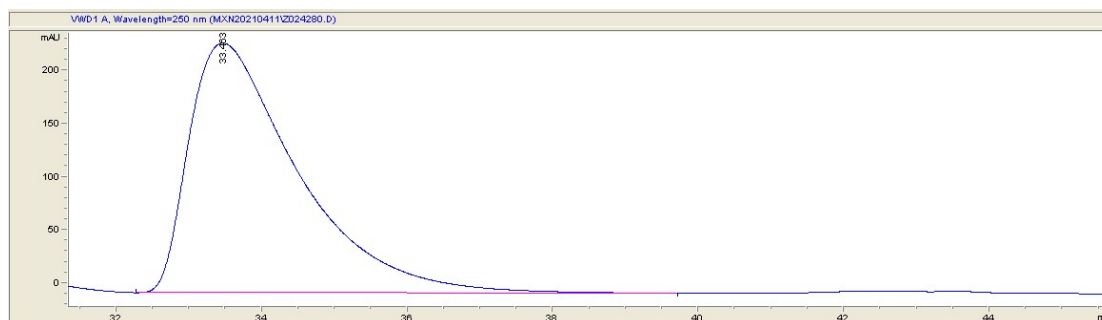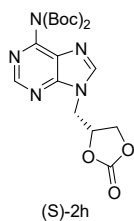

HPLC chromatograms (Daicel chiralpak OD, Hexanes/*i*-PrOH = 70:30, flow rate = 0.8 mL/min):  
23.1 min (minor), 27.6 min (major), >99% ee

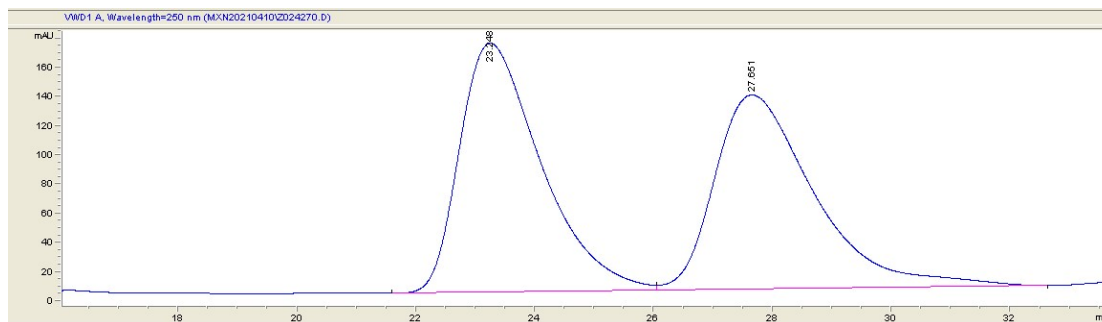

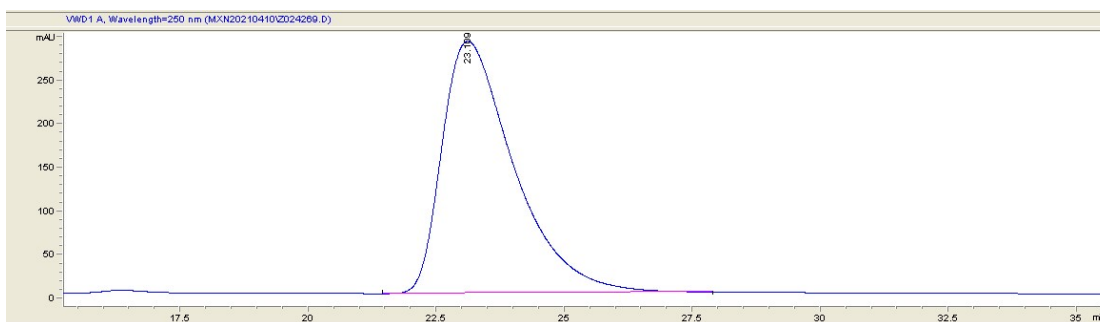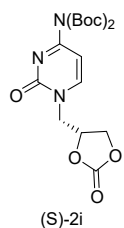

HPLC chromatograms (Daicel chiralpak AD, Hexanes/i-PrOH = 70:30, flow rate = 1 mL/min):  
18.6 min (minor), 24.3min (major), >99% ee

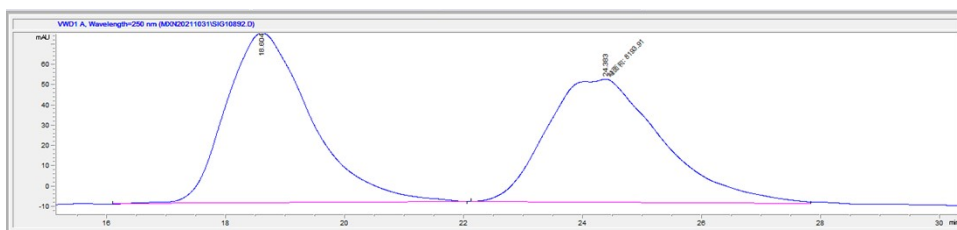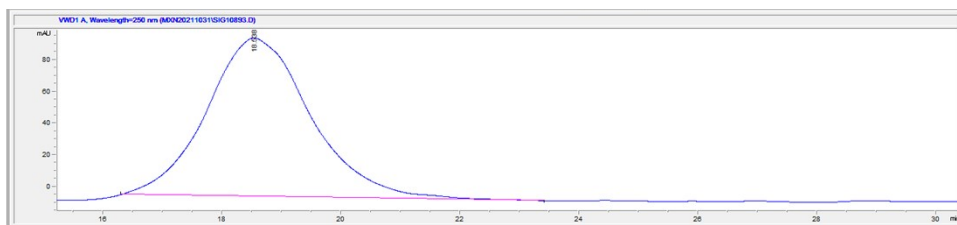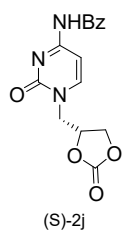

HPLC chromatograms (Daicel chiralpak OD, Hexanes/i-PrOH = 70:30, flow rate = 1 mL/min):  
10.7 min (minor), 13.3min (major), >99% ee

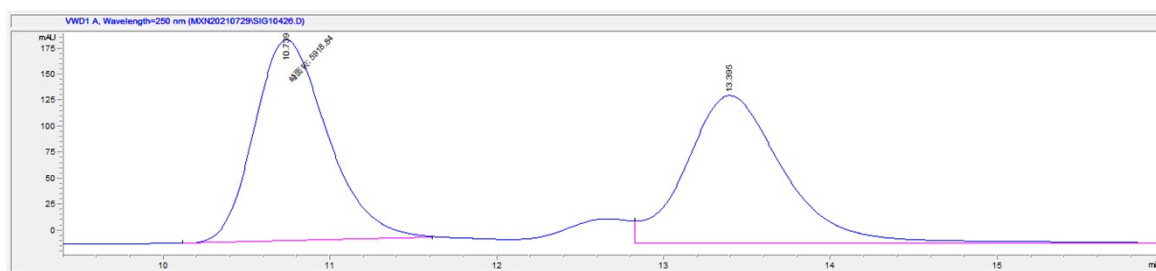

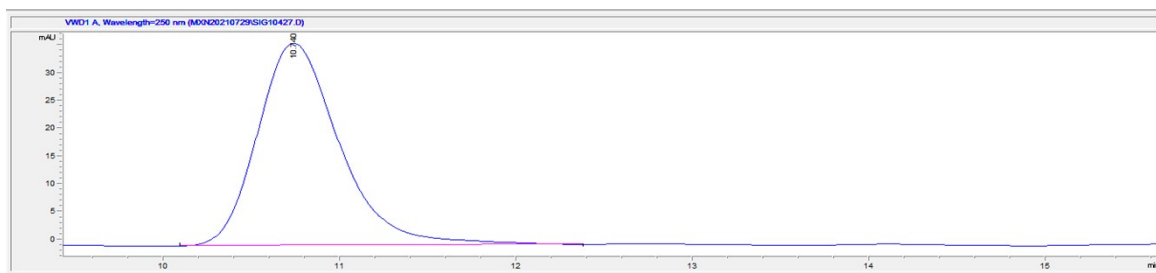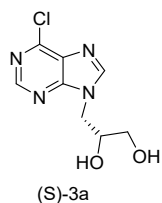

HPLC chromatograms (Daicel chiralpak OD, Hexanes/*i*-PrOH = 85:15, flow rate = 0.8 mL/min):  
15.3min (minor), 18.2 min (major), >99% ee

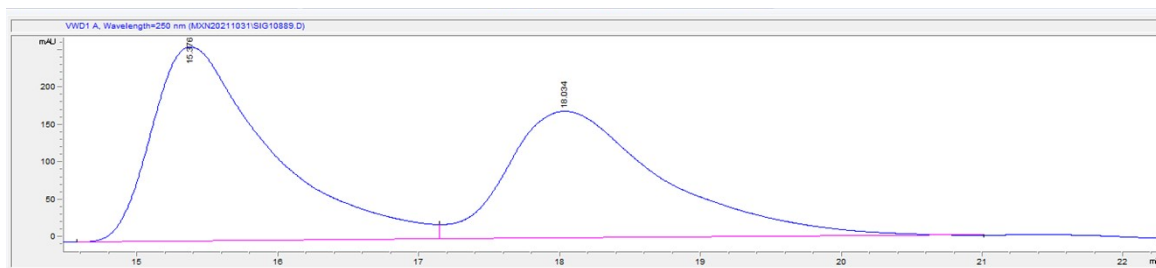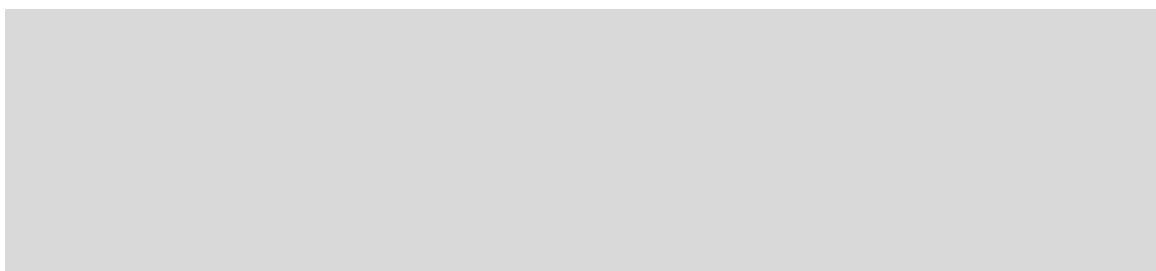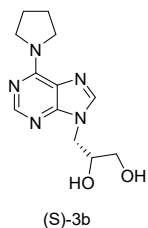

HPLC chromatograms (Daicel chiralpak OD, Hexanes/*i*-PrOH = 70:30, flow rate = 1 mL/min):  
6.2 min (minor), 8.1 min (major), >99% ee

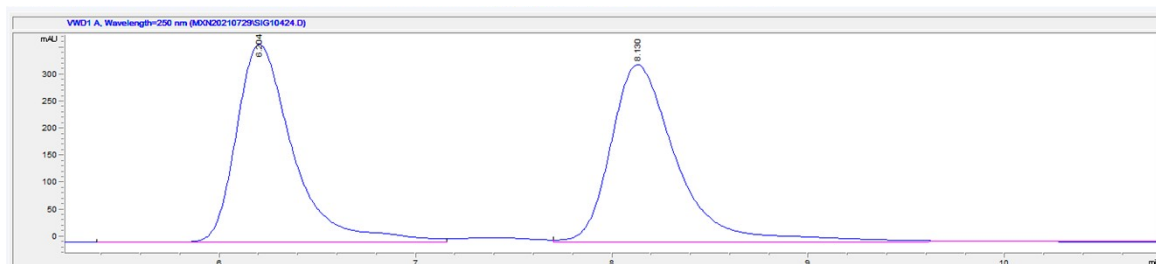

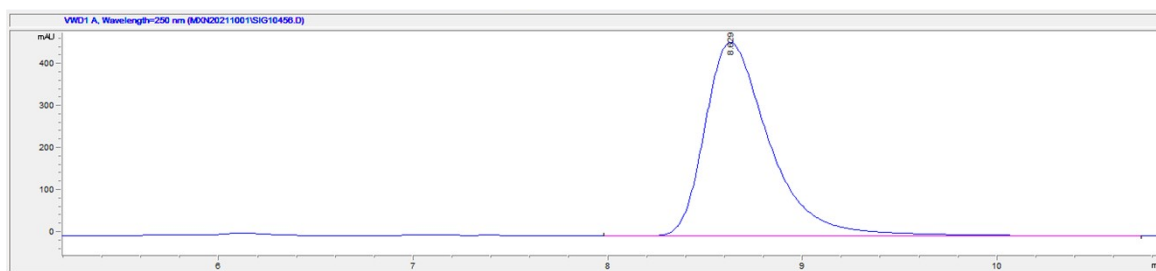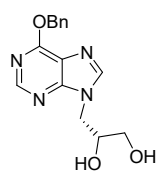

(S)-3c

HPLC chromatograms (Daicel chiralpak OD, Hexanes/*i*-PrOH = 70:30, flow rate = 1 mL/min):  
6.2 min (minor), 8.1 min (major), >99% ee

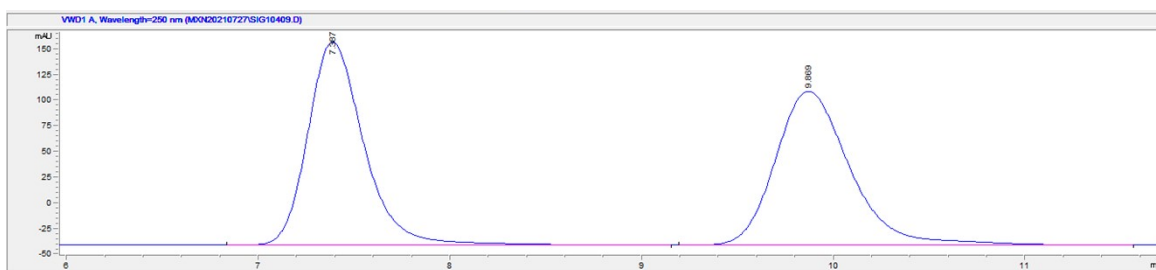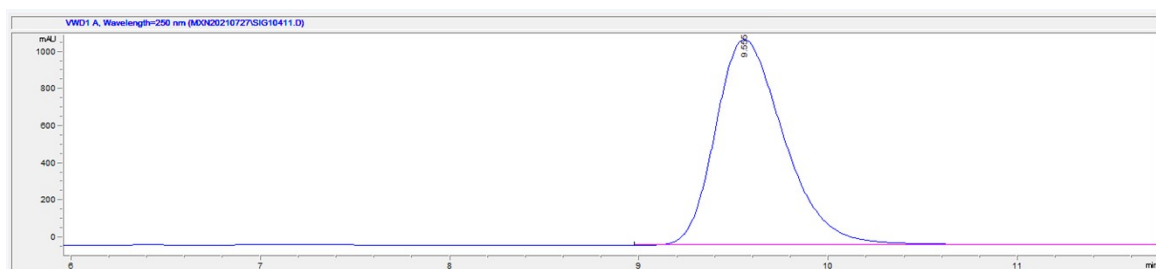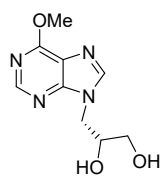

(S)-3d

HPLC chromatograms (Daicel chiralpak OD, Hexanes/*i*-PrOH = 90:10, flow rate = 0.8 mL/min):  
35.6 min (minor), 40.8 min (major), >99% ee

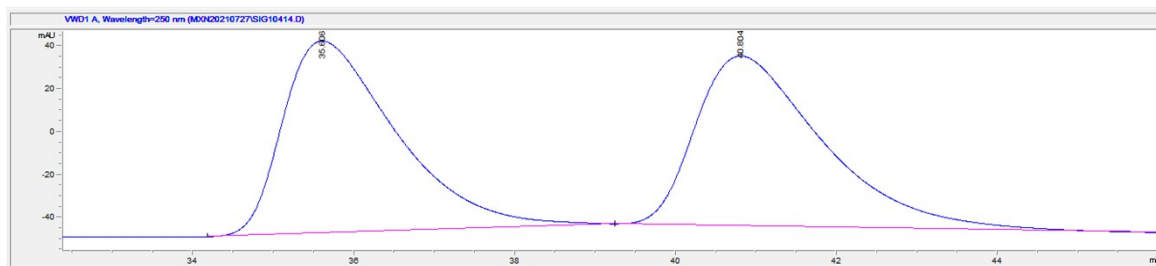



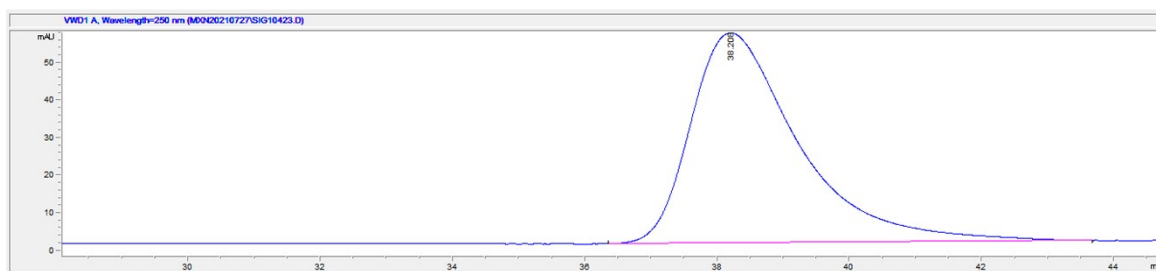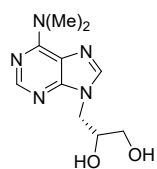

(S)-3e

HPLC chromatograms (Daicel chiralpak OD, Hexanes/*i*-PrOH = 70:30, flow rate = 1 mL/min): 5.7 min (minor), 6.7 min (major), >99% ee

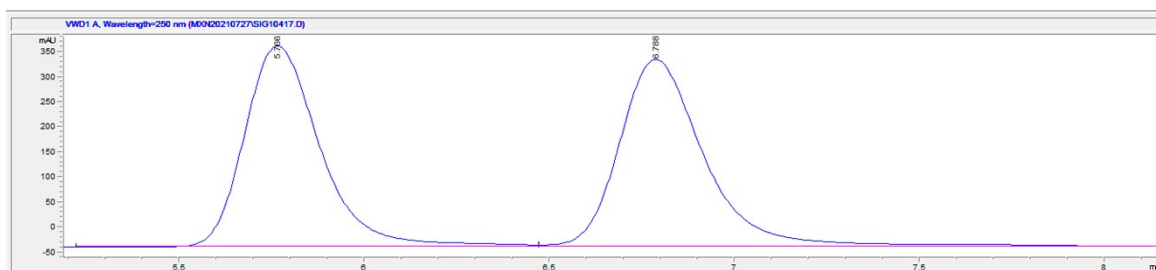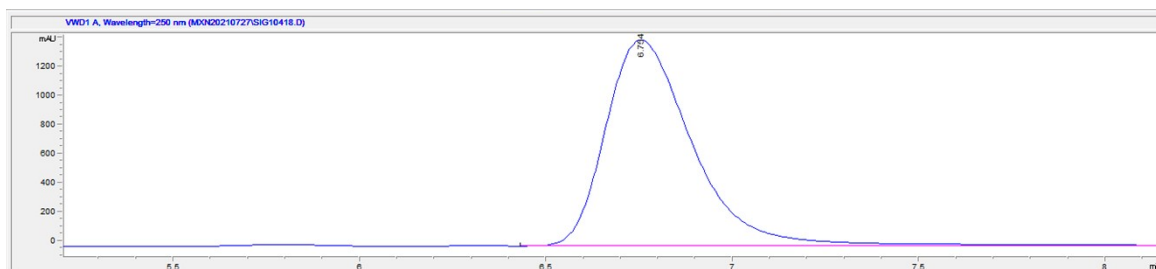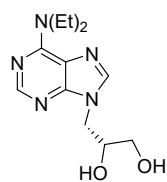

(S)-3f

HPLC chromatograms (Daicel chiralpak OD, Hexanes/*i*-PrOH = 85:15, flow rate = 1 mL/min): 6.7 min (minor), 7.7 min (major), >99% ee

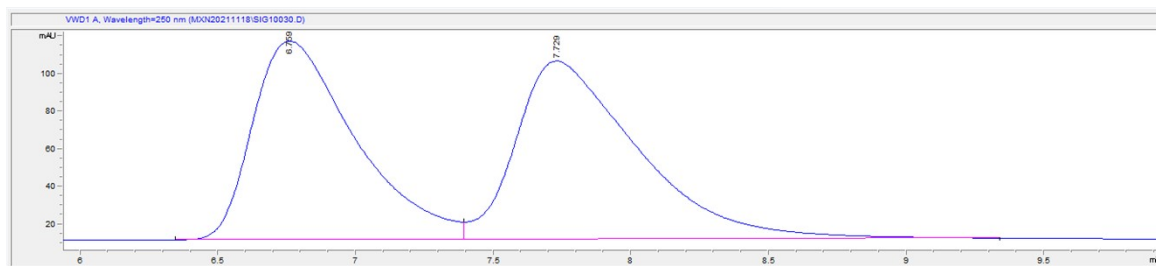

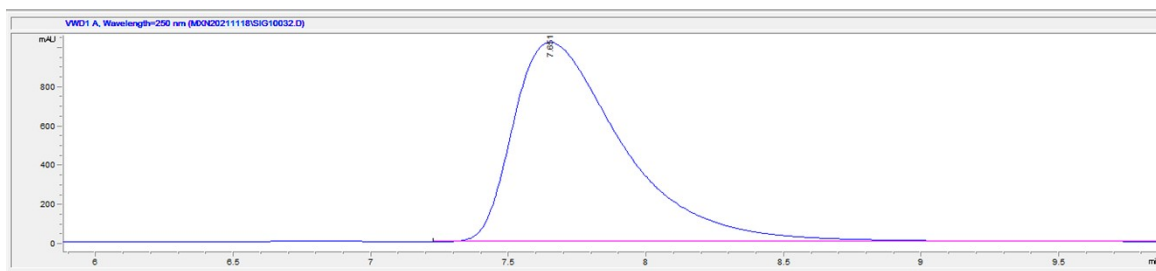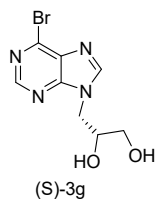

HPLC chromatograms (Daicel chiralpak OD, Hexanes/*i*-PrOH = 90:10, flow rate = 1 mL/min):  
33.4 min (minor), 37.6 min (major), 93% ee

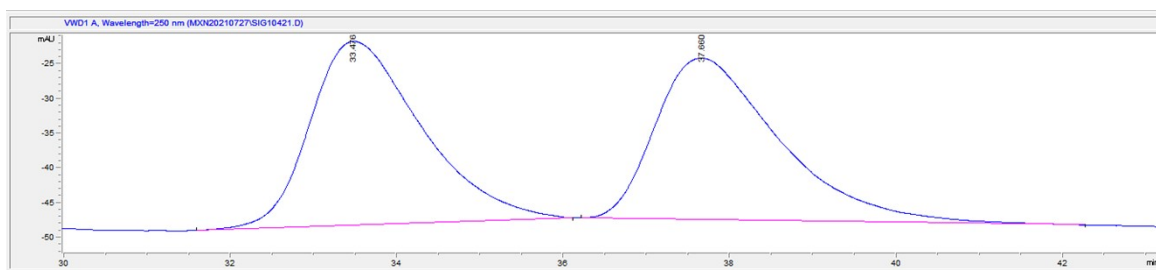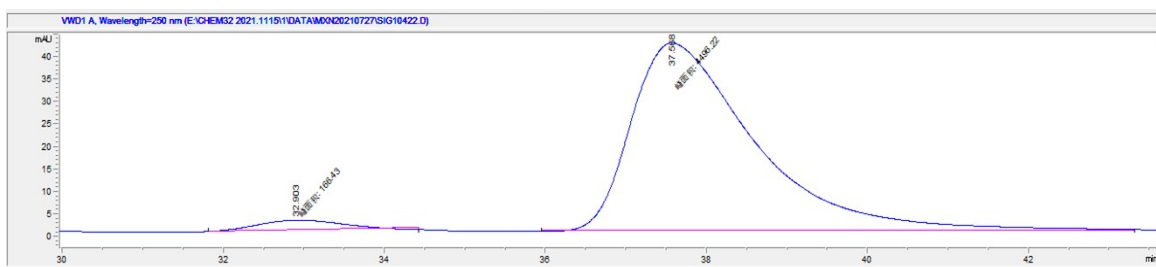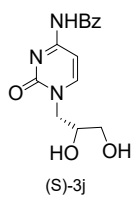

HPLC chromatograms (Daicel chiralpak OD, Hexanes/*i*-PrOH = 70:30, flow rate = 1 mL/min):  
13.5 min (minor), 18.3 min (major), >99% ee

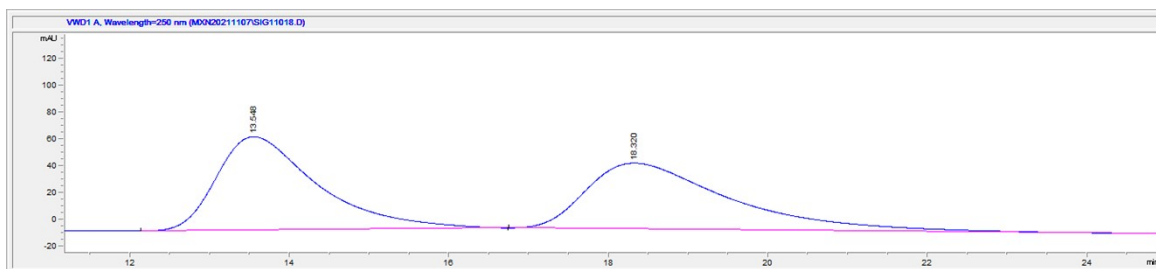

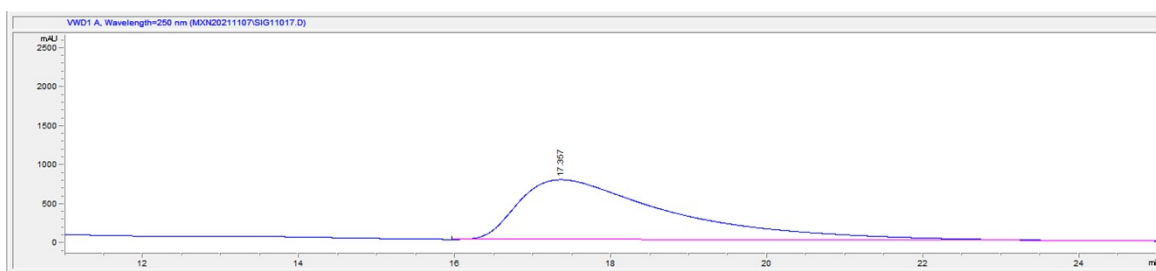

## Notes and references

1. Q. Zhang, Y.Z. Huang, J. H. Yang, B.W. Ma, G. R. Qu, H. M. Guo, *Tetrahedron Letters*, 2014, **55**, 1203–1206.
2. T. Ying, X. Tan, Q. Su, W. Cheng, L. Dong and S. Zhang, *Green Chemistry*, 2019, **21**, 2352-2361.
3. J. Liu, G. Yang, Y. Liu, D. Wu, X. Hu and Z. Zhang, *Green Chemistry*, 2019, **21**, 3834-3838.
4. H. Gou, X. Ma, Q. Su, L. Liu, T. Ying, W. Qian, L. Dong and W. Cheng, *Phys Chem Chem Phys*, 2021, **23**, 2005-2014.
5. F. D. Bobbink, D. Vasilyev, M. Hulla, S. Chamam, F. Menoud, G. Laurenczy, S. Katsyuba and P. J. Dyson, *ACS Catal.*, 2018, **8**, 2589-2594.
6. H. Song, Y. Wang, M. Xiao, L. Liu, Y. Liu, X. Liu and H. Gai, *ACS Sustain. Chem. Eng.*, 2019, **7**, 9489-9497.
7. E. Hernández, R. Santiago, C. Moya, P. Navarro and J. Palomar, *J. Mol. Liq.*, 2021, **324**.
8. Y. Gong, Y. Li, J. Hu, Z. Wang and T. Deng, *New J. Chem.*, 2021, **45**, 19215-19218.
9. W. Zhang, J. He, B. Zhang, Y. Wang, J. Luo, Y. Zhao and C. Li, *Chemical Papers*, 2020, **74**, 2583-2590.
10. S. Chen, R. An, Y. Li, Y. Zhu, X. Zhu, R. Liu and X. Li, *Catalysis Science & Technology*, 2021, **11**, 6498-6506.
